# Supplementary material
Source: PubMed Central journal article supplement (PMC6102987)
Supplement: zam017188686s1.pdf [file zam017188686s1.pdf]

## Supplementary

### Figure S1

Split graphs resulting from split decomposition analysis of amino acid sequences of 29 ribosomal protein (S1A) and 12 phylogenetic markers (S1B). Colours refer to the same phylogroups indicated in Figure 1. Orange: *L. delbrueckii* group; red: *L. alimentarius* group; green: *L. perolens* group; dark grey: *L. casei* group; dark pink: *L. sakei* group; violet: *L. salivarius* group; brown: *L. reuteri* group; light grey: *L. buchneri* group; light blue: *L. plantarum* group; light pink: *L. coryniformis* group.

### Figure S2

Histograms of the Average Nucleotide Identity (ANI), Average Amino acid Identity (AAI), and Percentage of Conserved Protein (POCP) values. Red bars indicate the following thresholds: <75-80% ANI indicate that genomes are too divergent to be compared based on ANI; 55-60% AAI is set as genus boundary based on AAI; 50% POCP is set as genus boundary based on POCP.

### Figure S3

16S rRNA gene sequence-based phylogenetic trees of all members of each phylogroup. The tree was calculated using Tamura Three Parameters as distance matrix formula and minimum evolution as tree reconstruction method. Bootstrap values (1,000 replicates) are reported in percentage at nodes (values below 60% are not shown). The reference species for each group is indicated in red. A: *L. delbrueckii* group; B: *L. alimentarius* group; C: *L. perolens* group; D: *L. casei* group; E: *L. sakei* group; F: *L. plantarum* group; G: *L. coryniformis* group; H: *L. salivarius* group; I: *L. reuteri* group; J: *L. buchneri* group; K: genus *Pediococcus*; L: family Leuconostocaceae. *L. selangorensis* is reported in *L. casei* phylogroup; couples (*L. rossiae-L. siliginis*; *L. concavus-L. dextrinicus* are not reported). *L. curtus* have been recently described and it is associated to *L. rossiae-L. siliginis*.

# Suppl Figure S1A

10,01

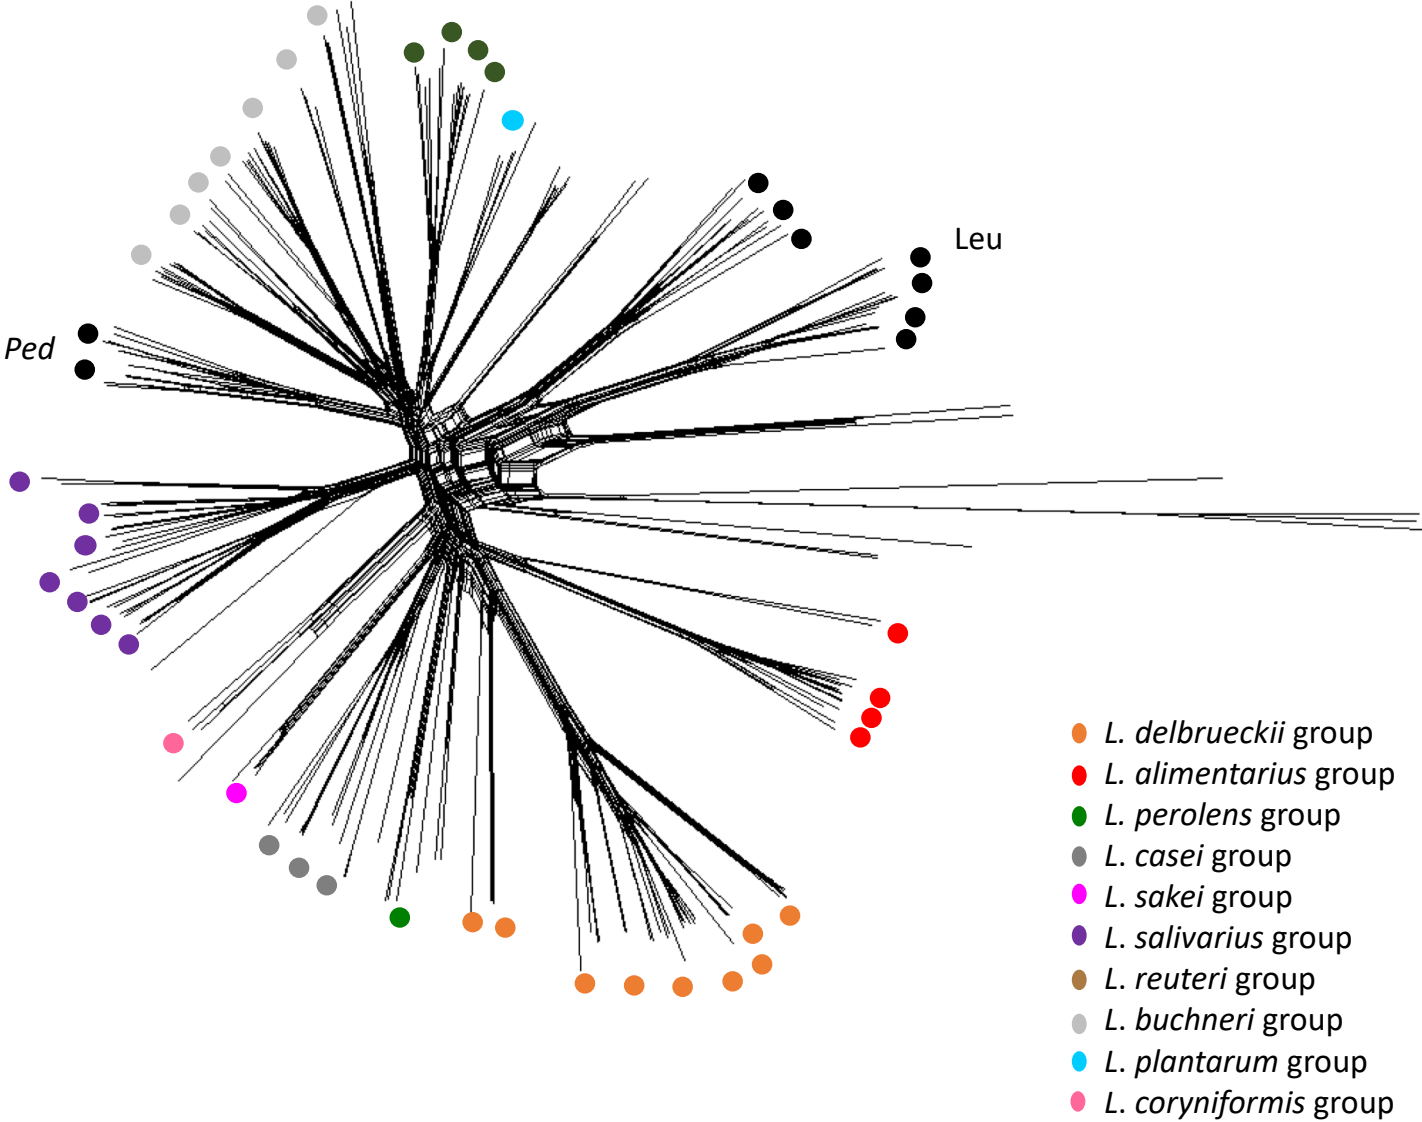

# Suppl Figure S1B

0.01

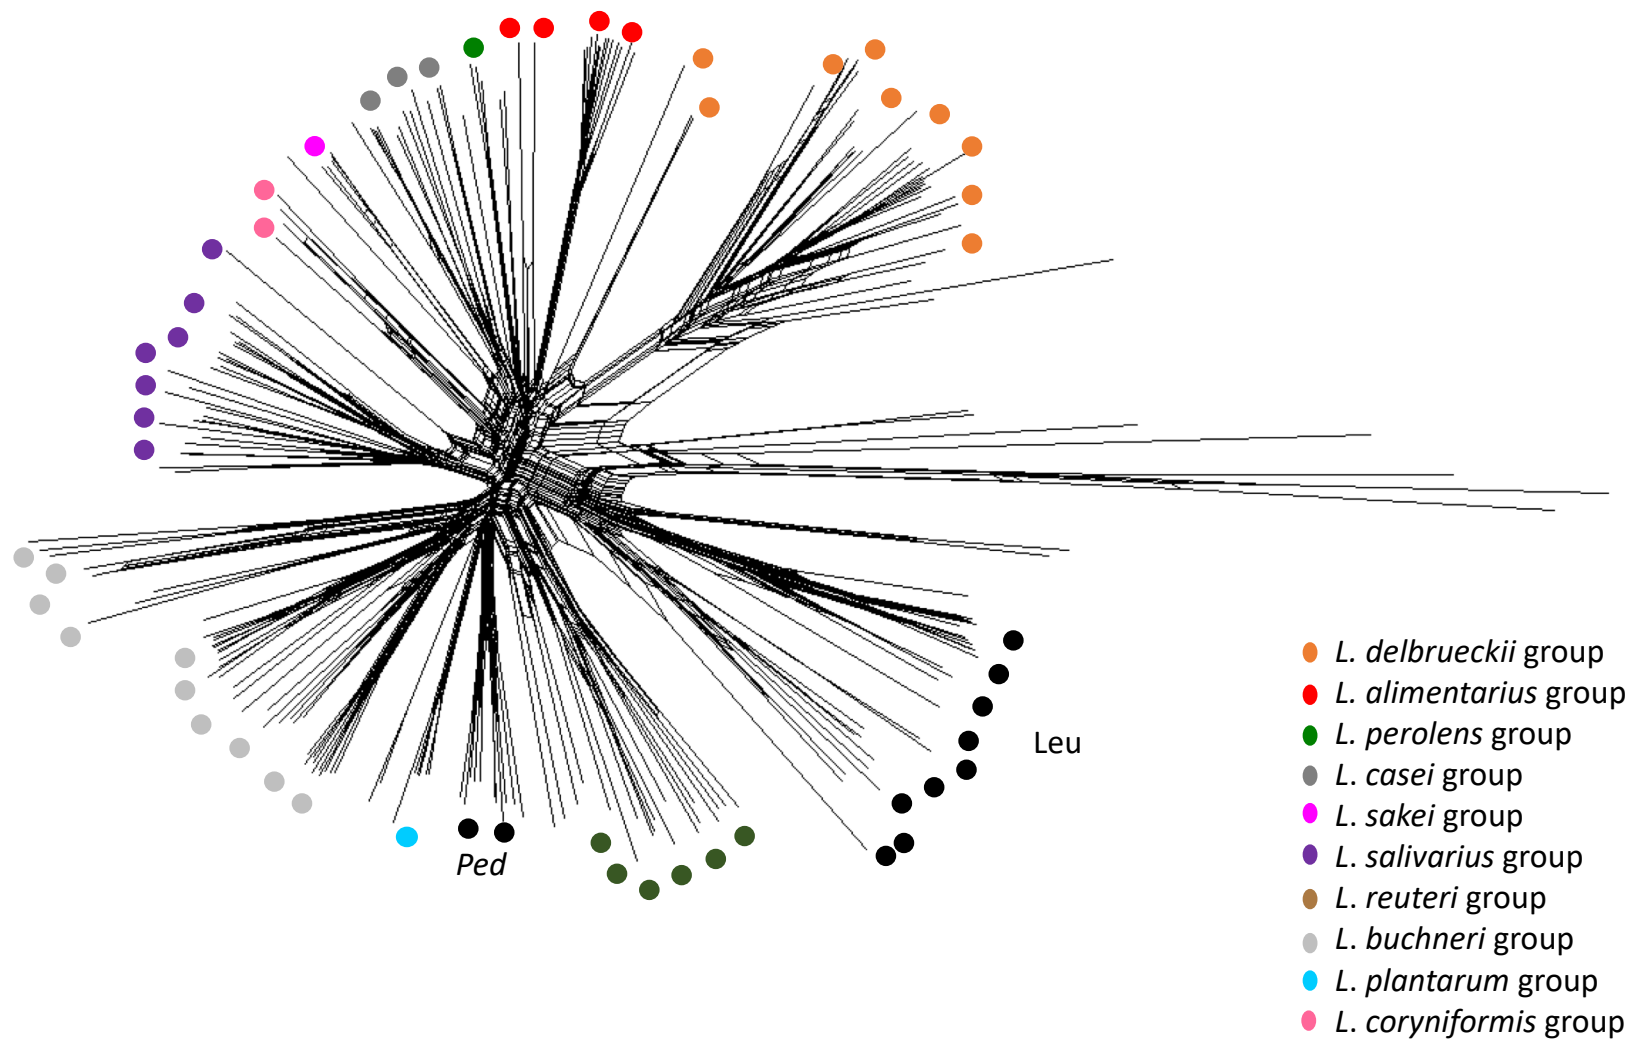

# Suppl Figure S2

## ANI

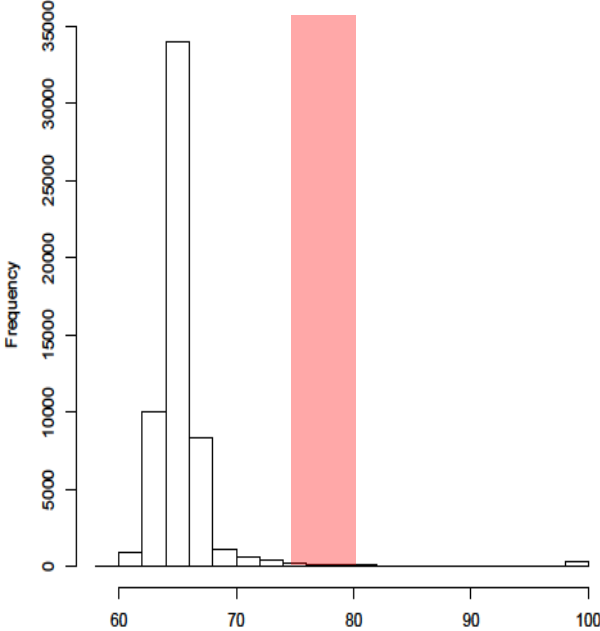

## AAI

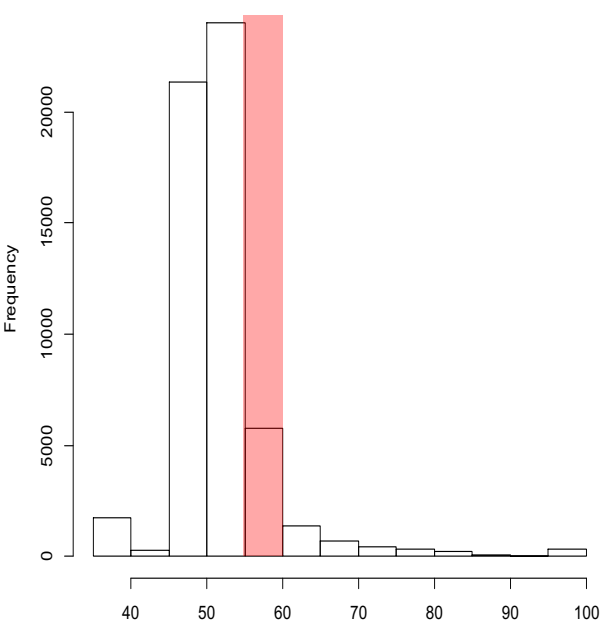

## POCP

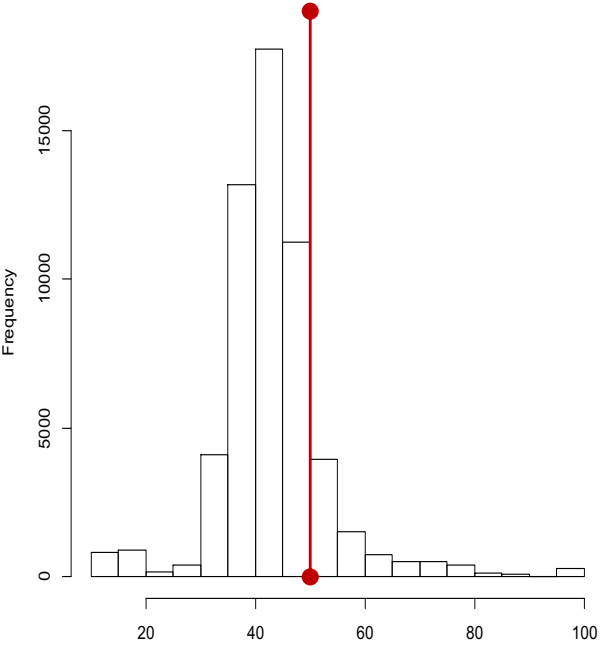

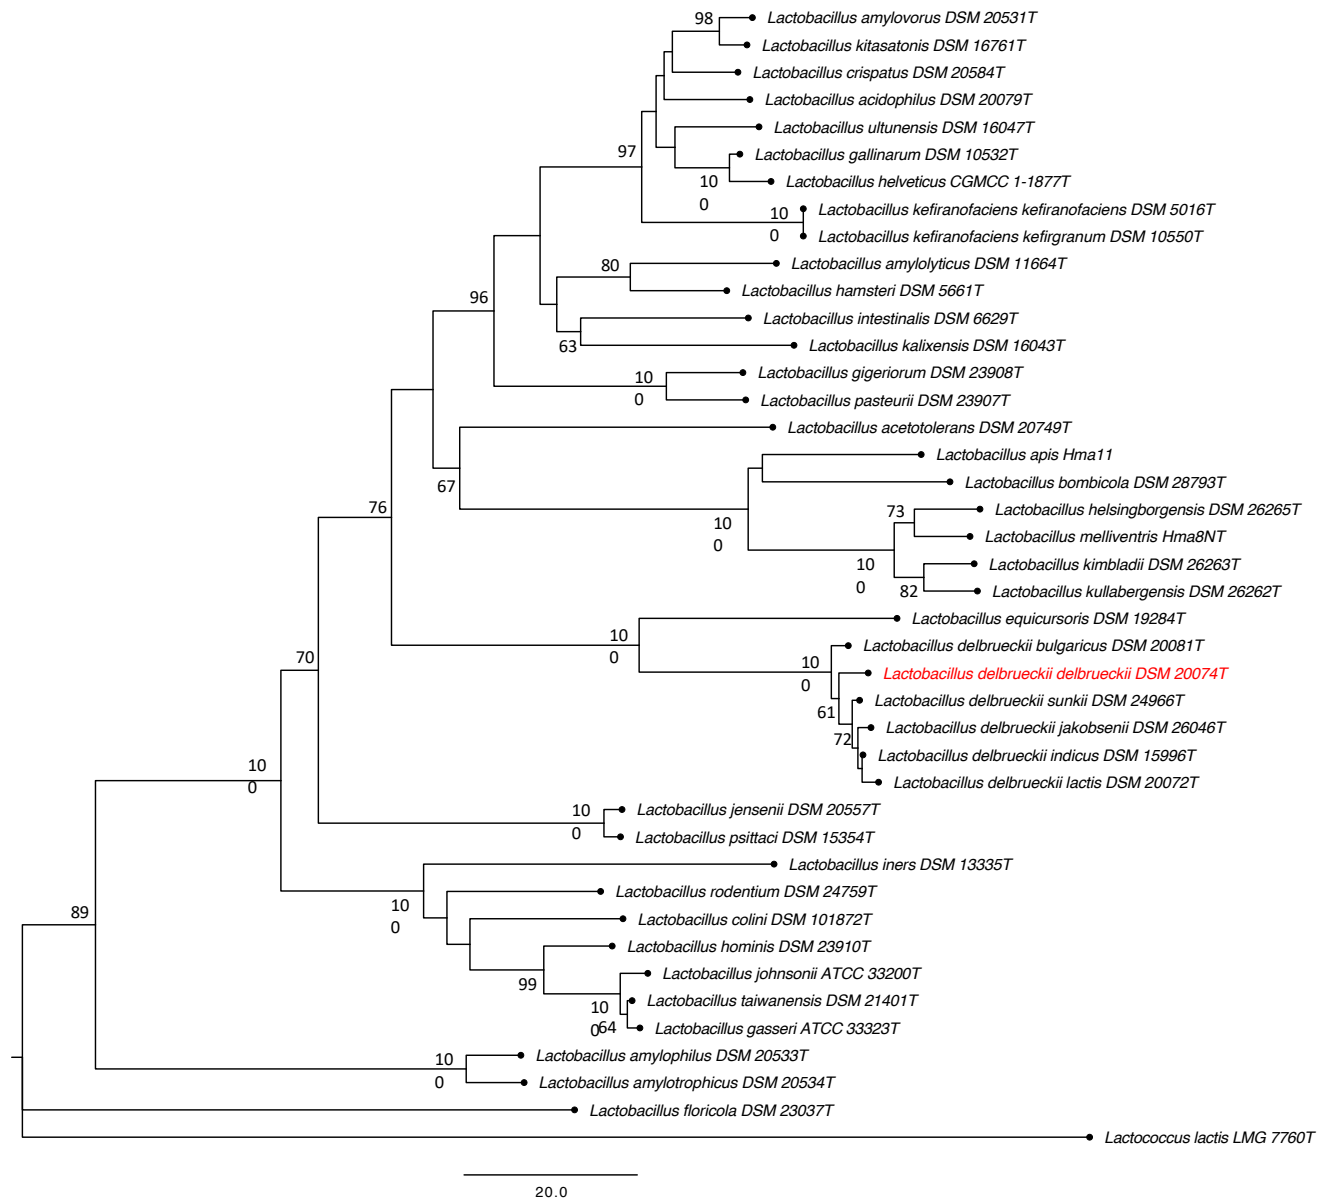

Figure S3A: *L. delbrueckii* group

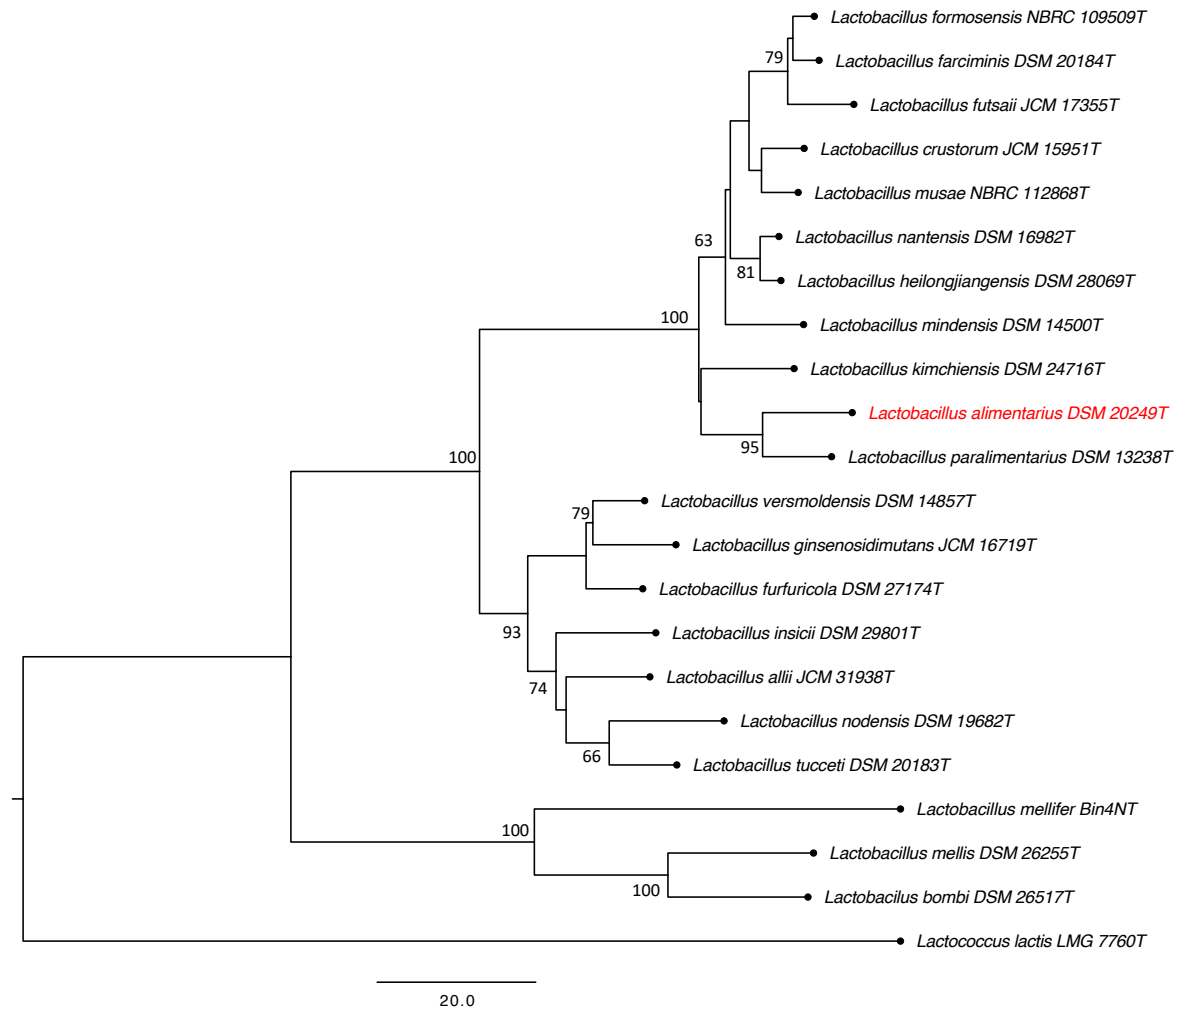

**Figure S3B:** *L. alimentarius* group

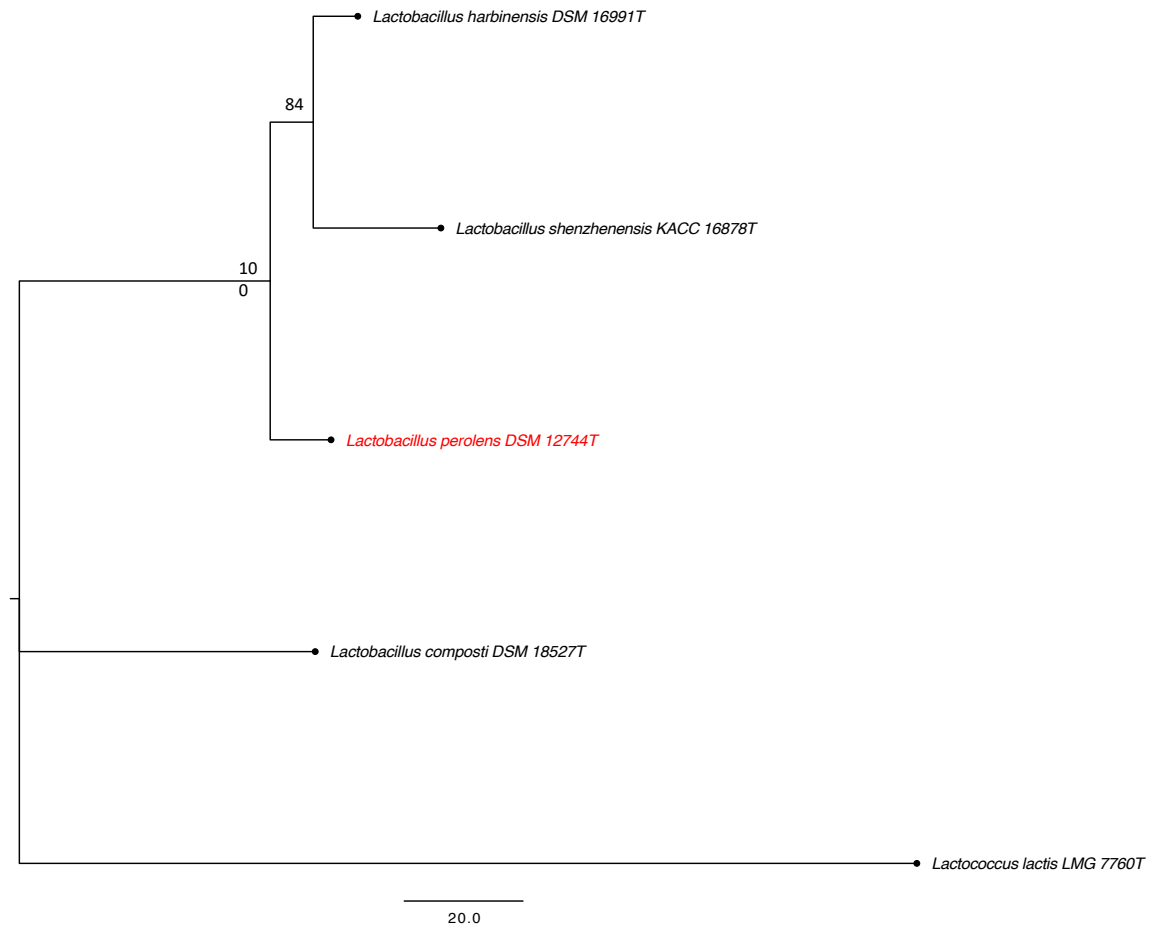

**Figure S3C:** *L. perolens* group

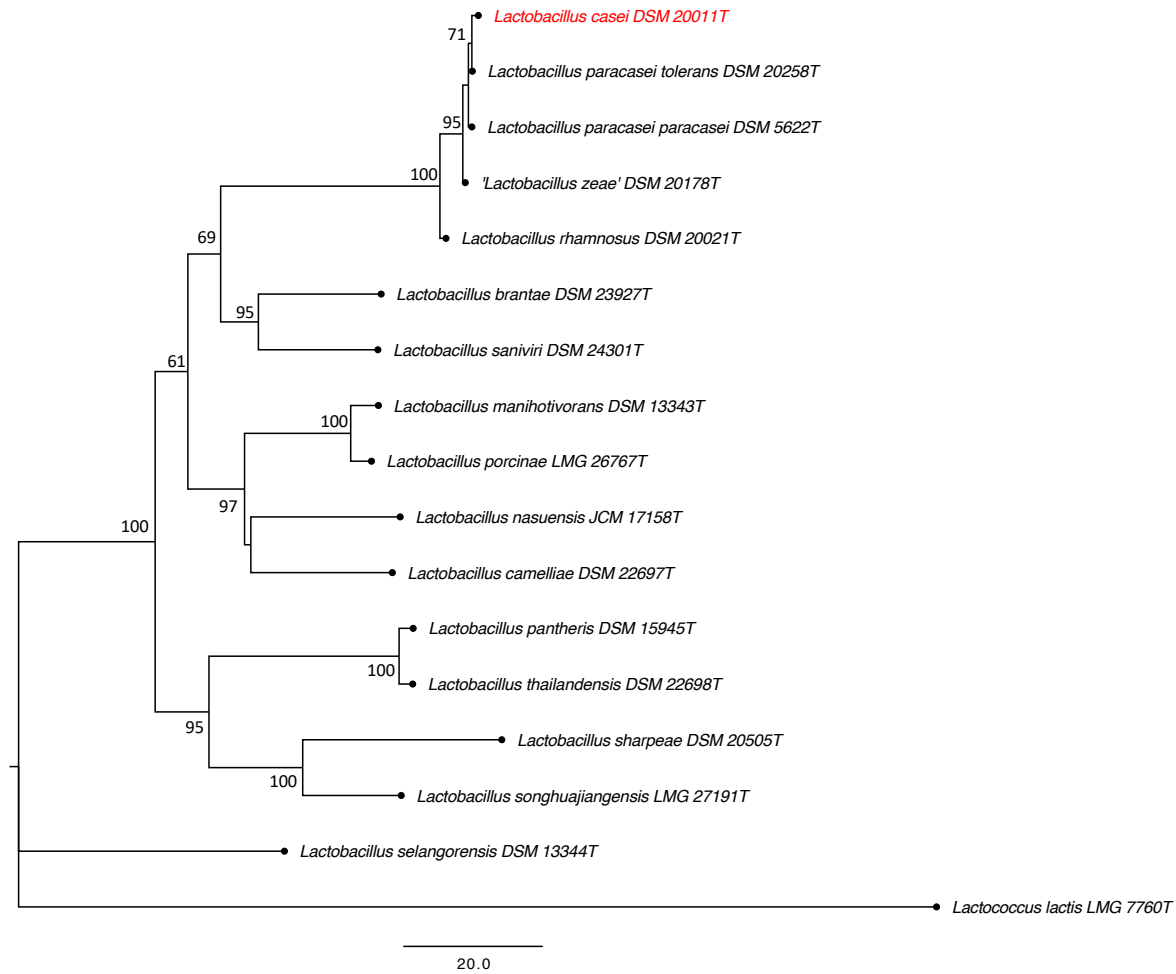

**Figure S3D:** *L. casei* group (*L. chiayiensis* has been recently described and it is related to *L. casei*)



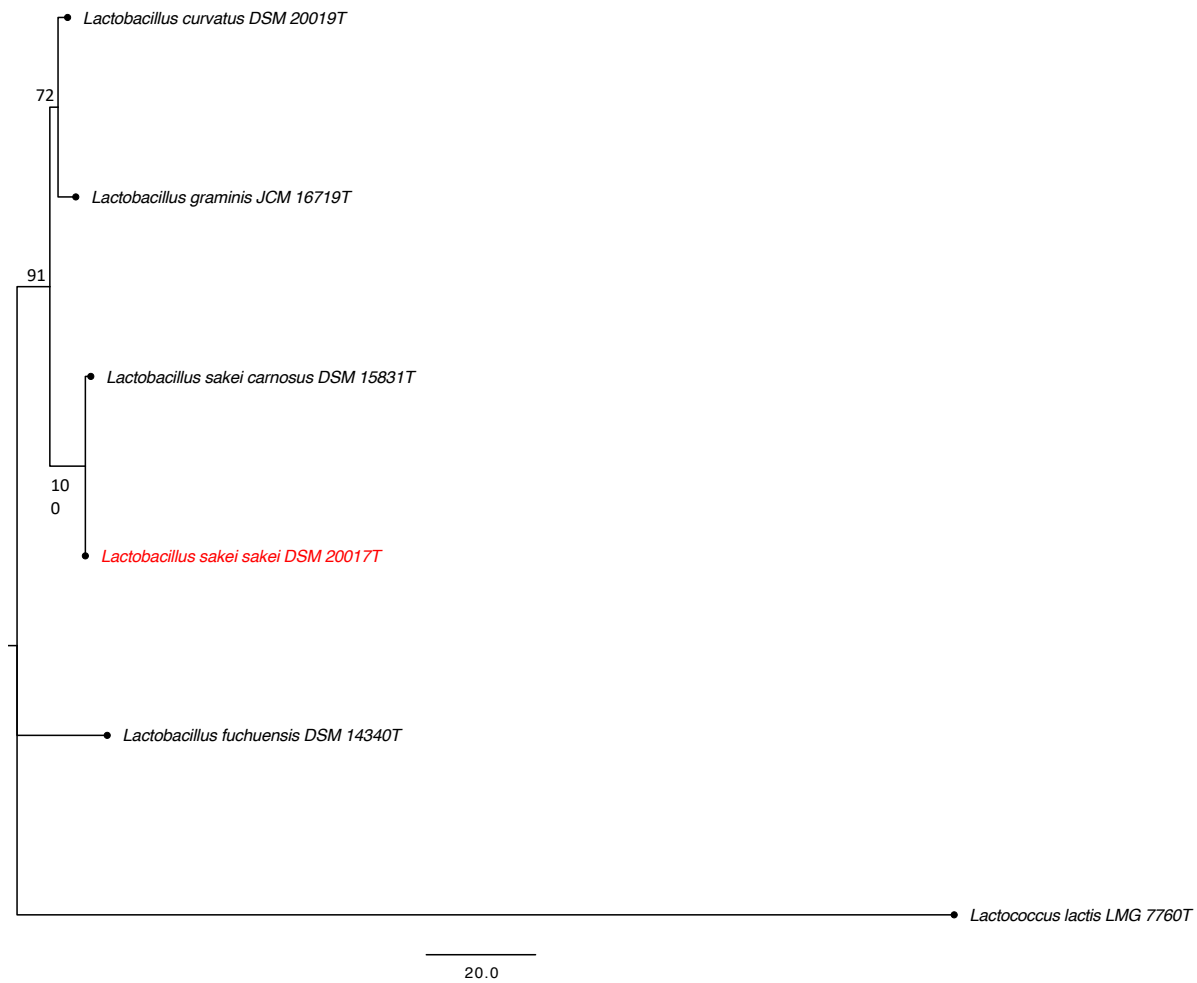

Figure S3E: *L. sakei* group

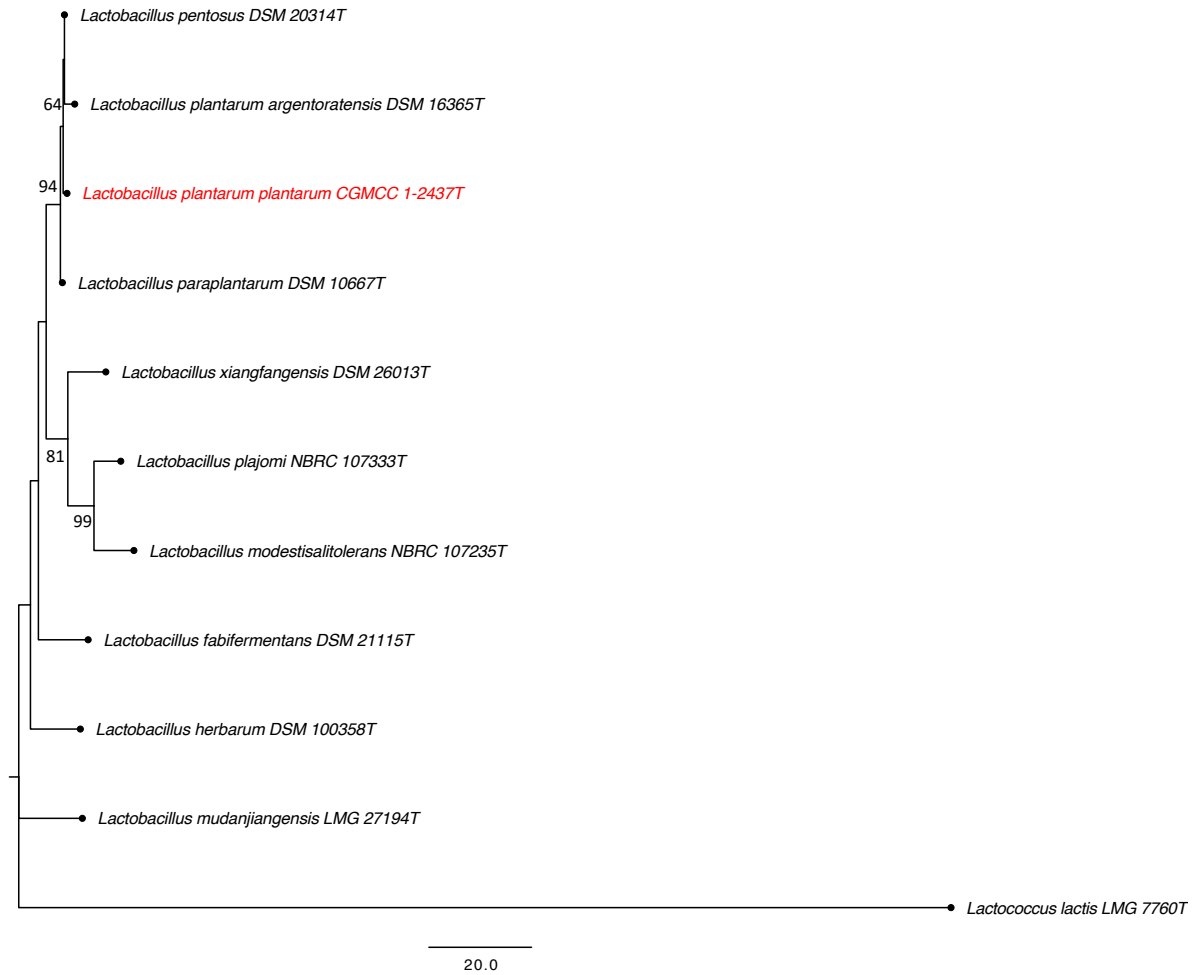

Figure S3F: *L. plantarum* group

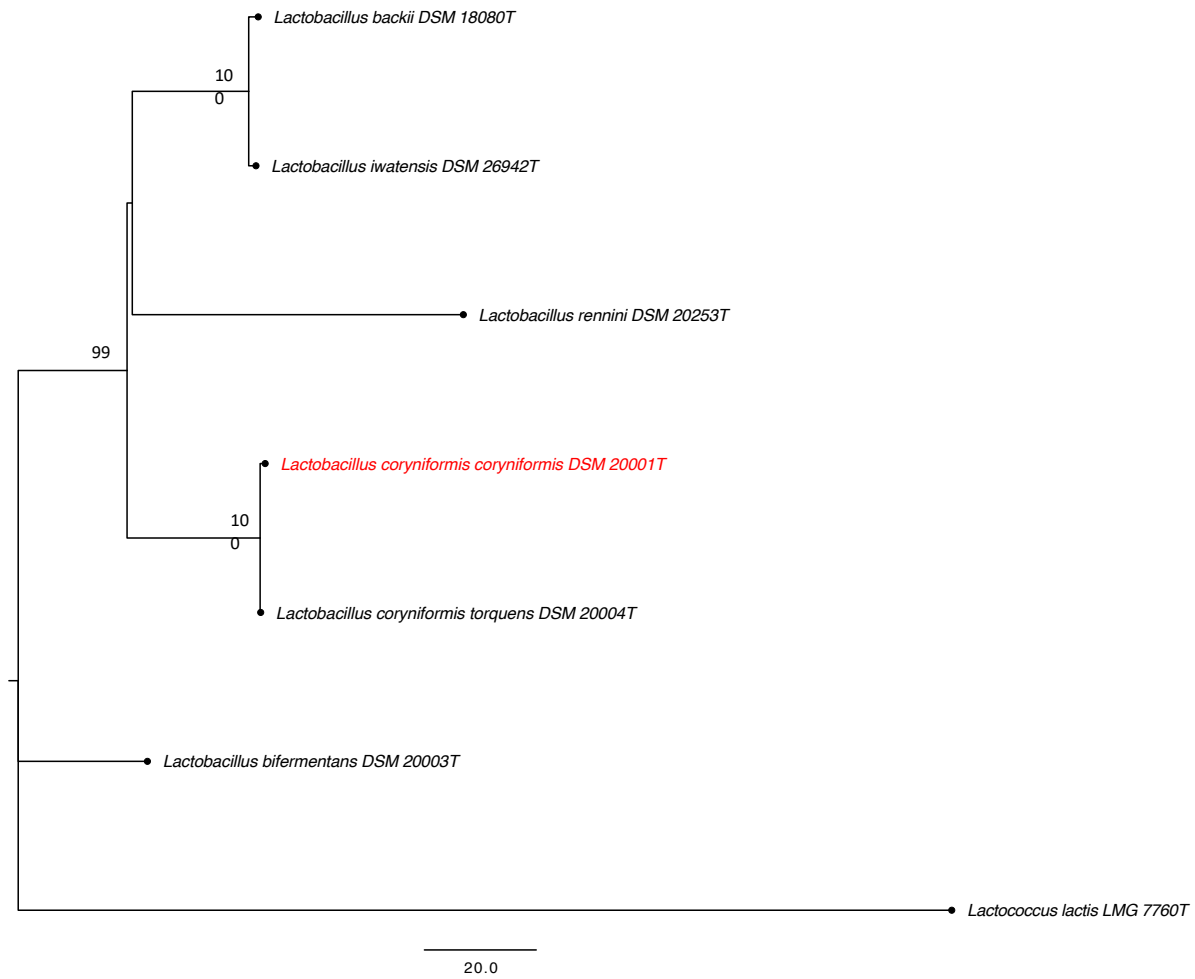

**Figure S3G: *L. coryniformis* group**

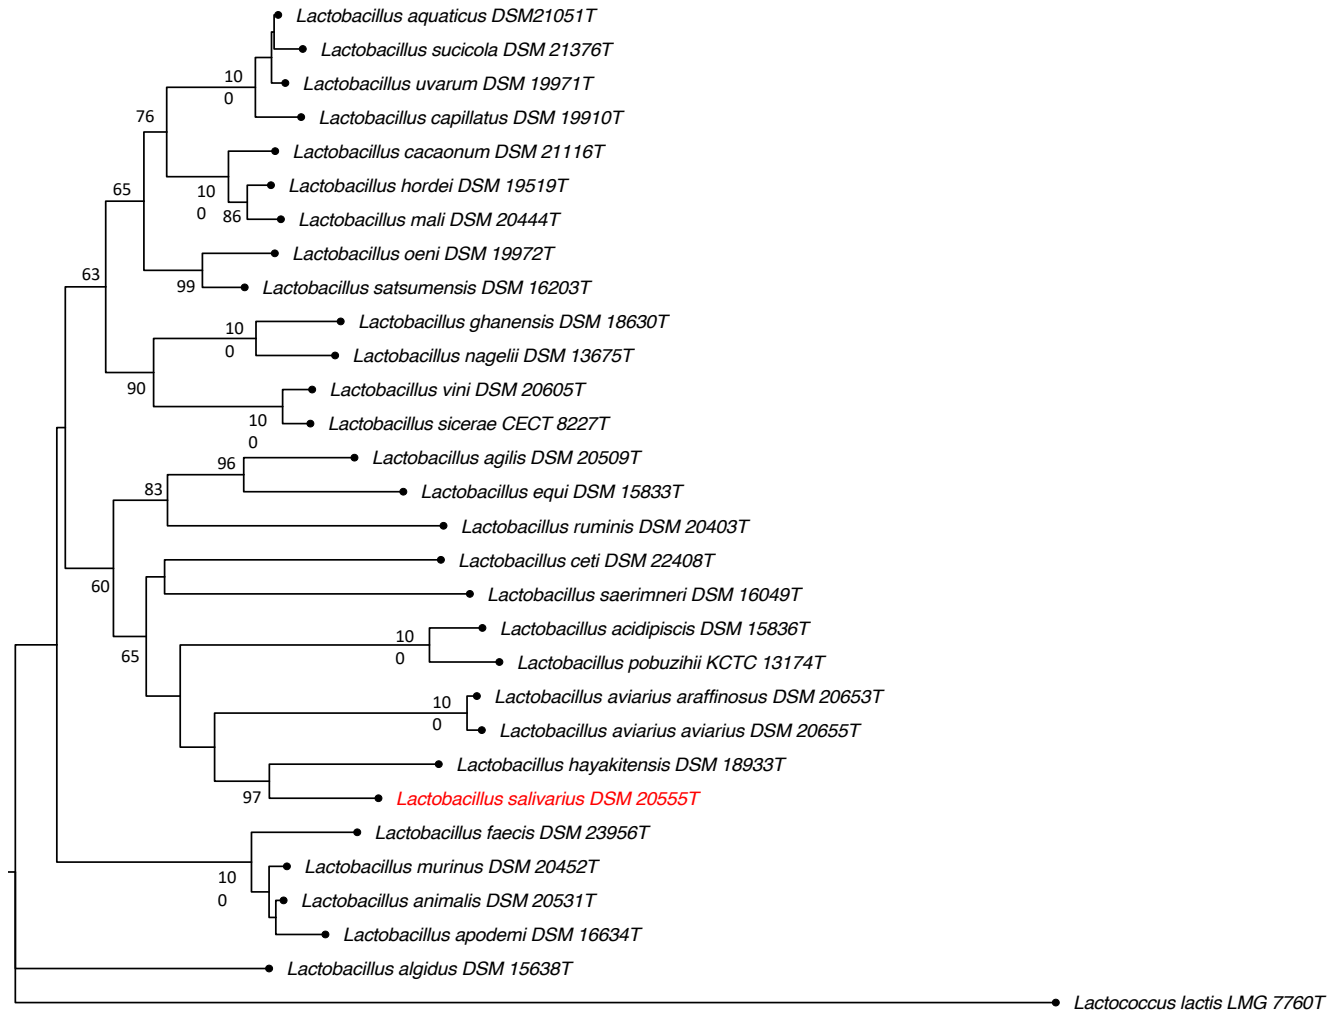

20.0

Figure S3H: *L. salivarius* group

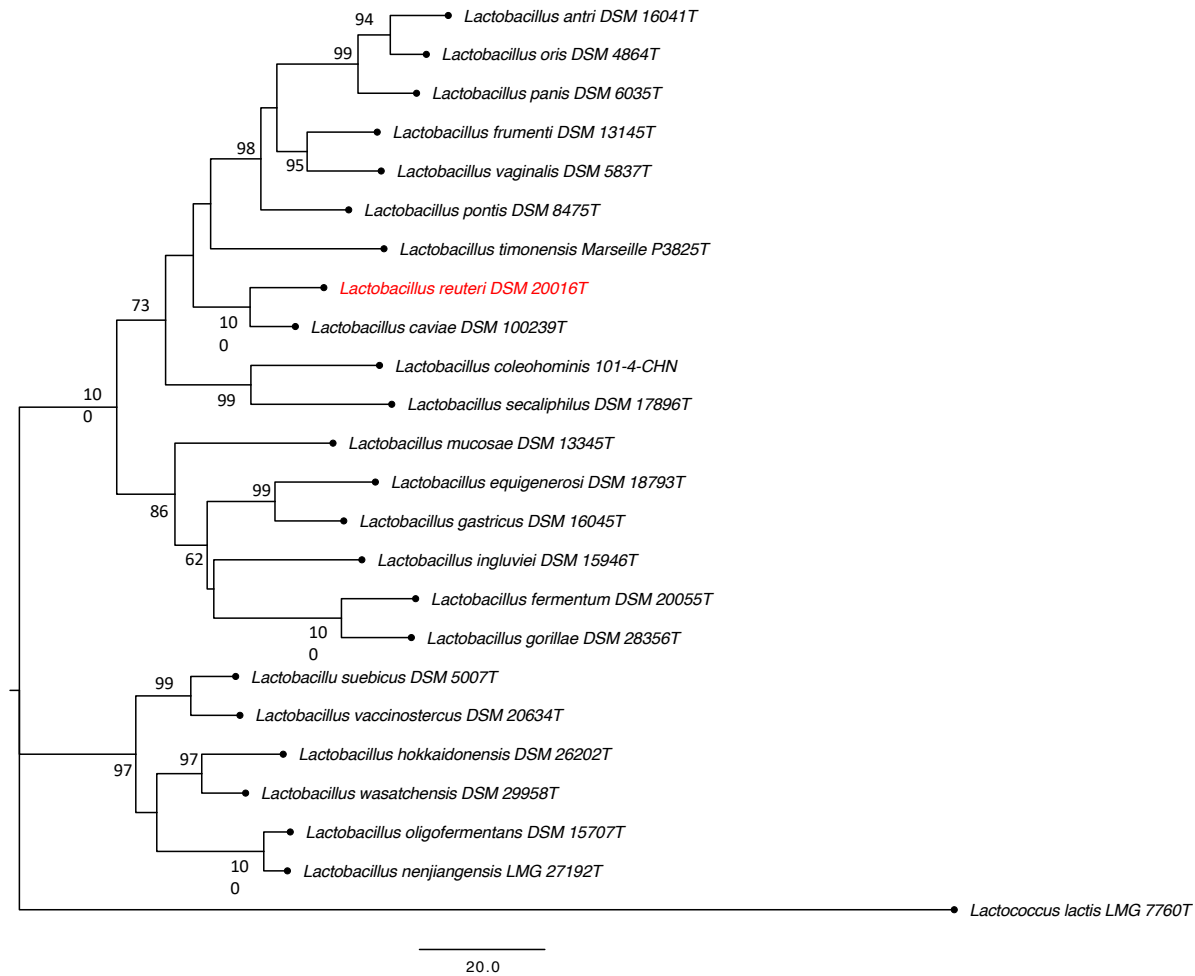

Figure S3I: *L. reuteri* group

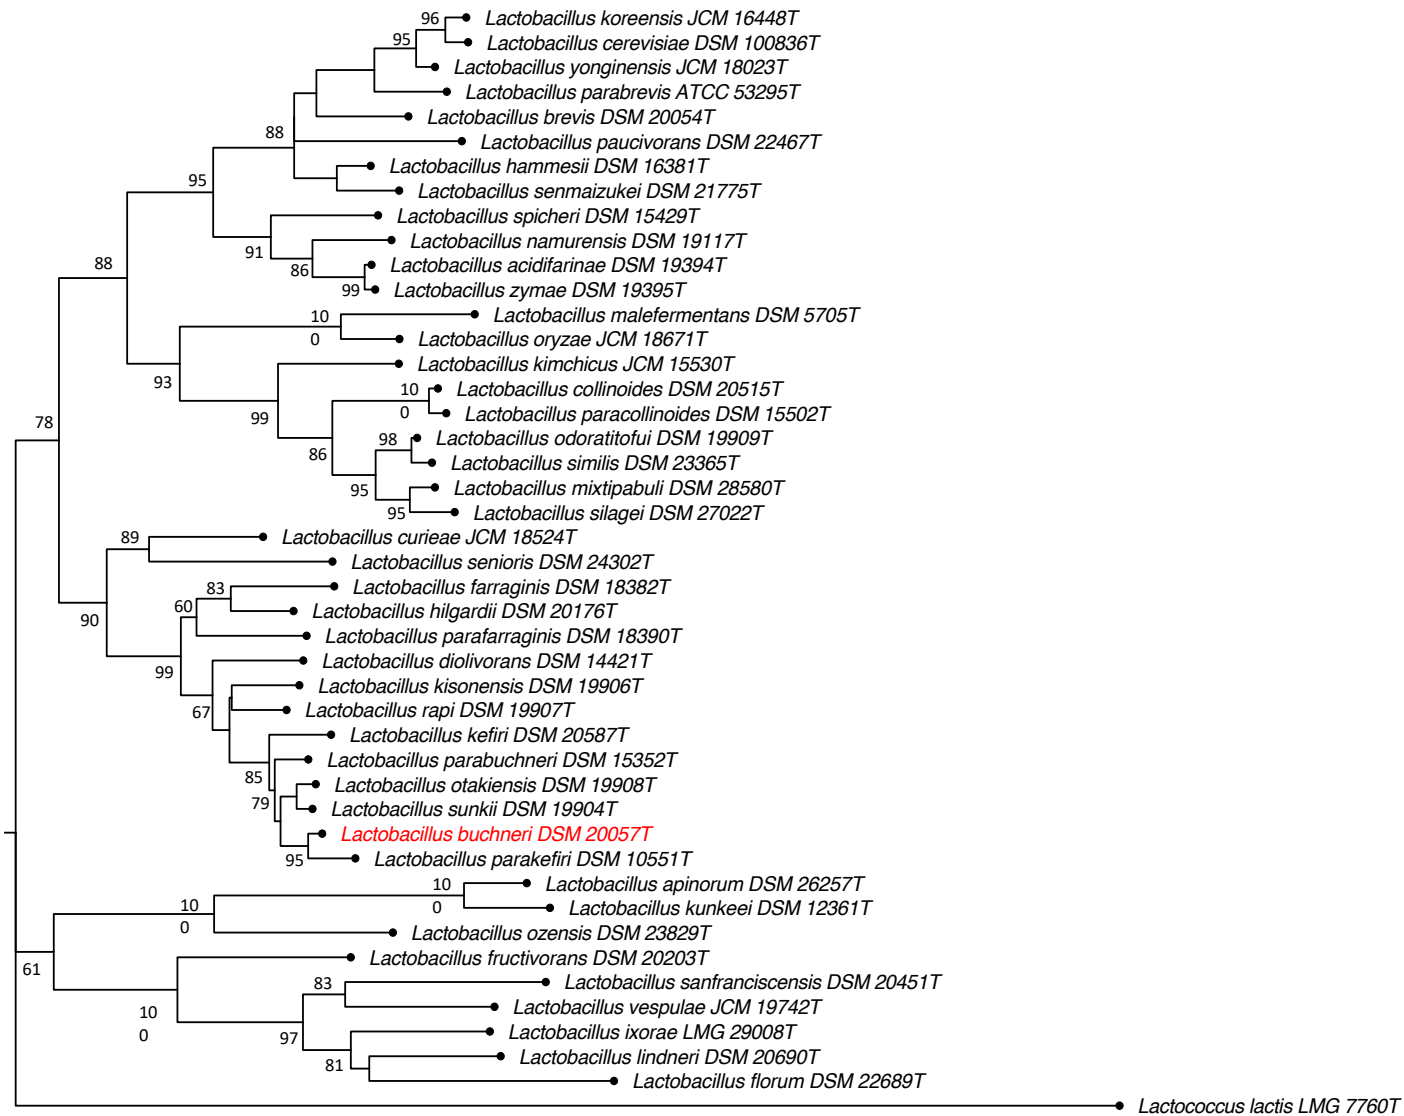

**Figure S3J:** *L. buchneri* group (*L. silangicola*, *L. pentosiphilus*, *L. kosoii*, *L. raoultii* have been recently described, thus they are not reported in the tree but they are related to *L. mixtipabuli*, *L. silagei*, *L. kunkeei*, *L. farraginis*).

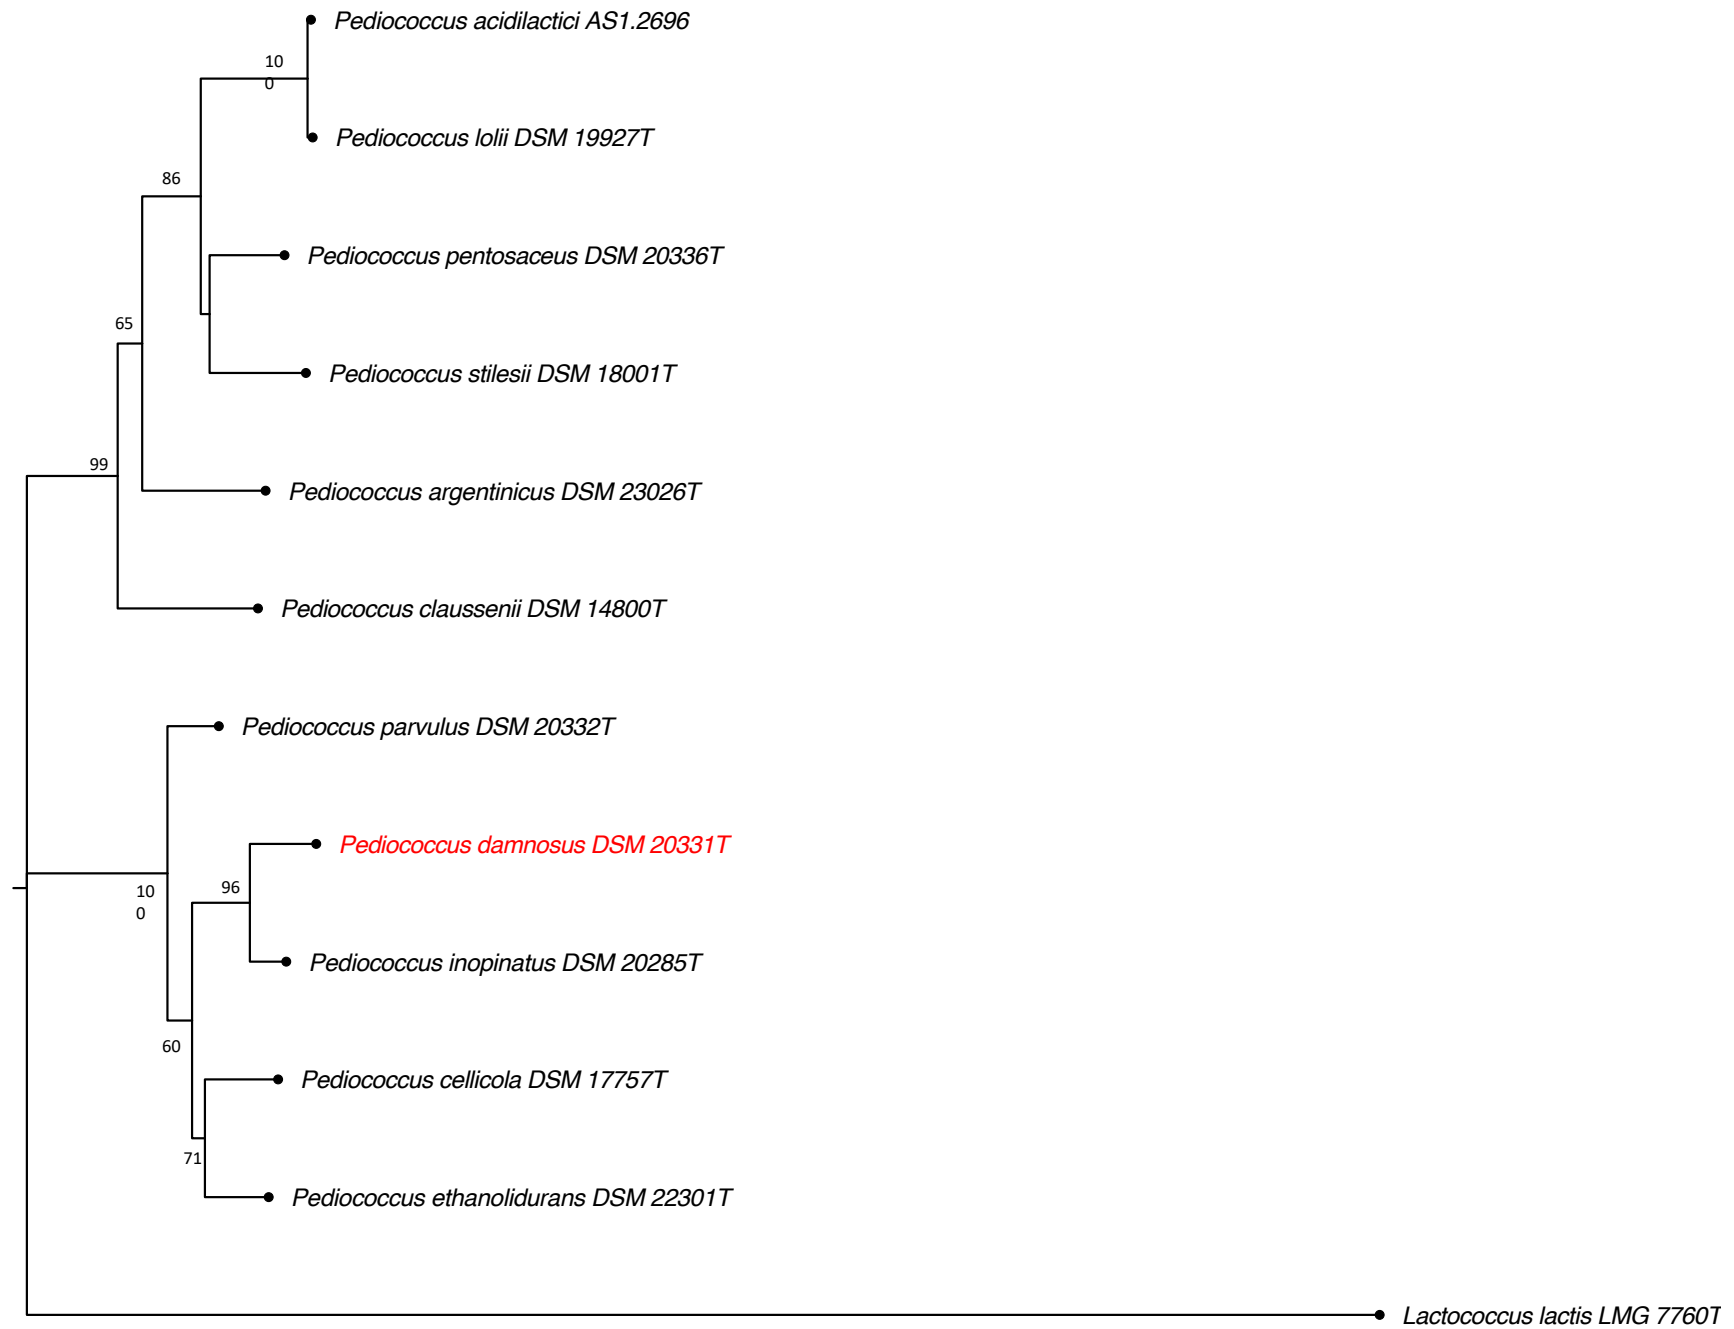

**Figure S3K: *Pediococcus* genus**  20.0

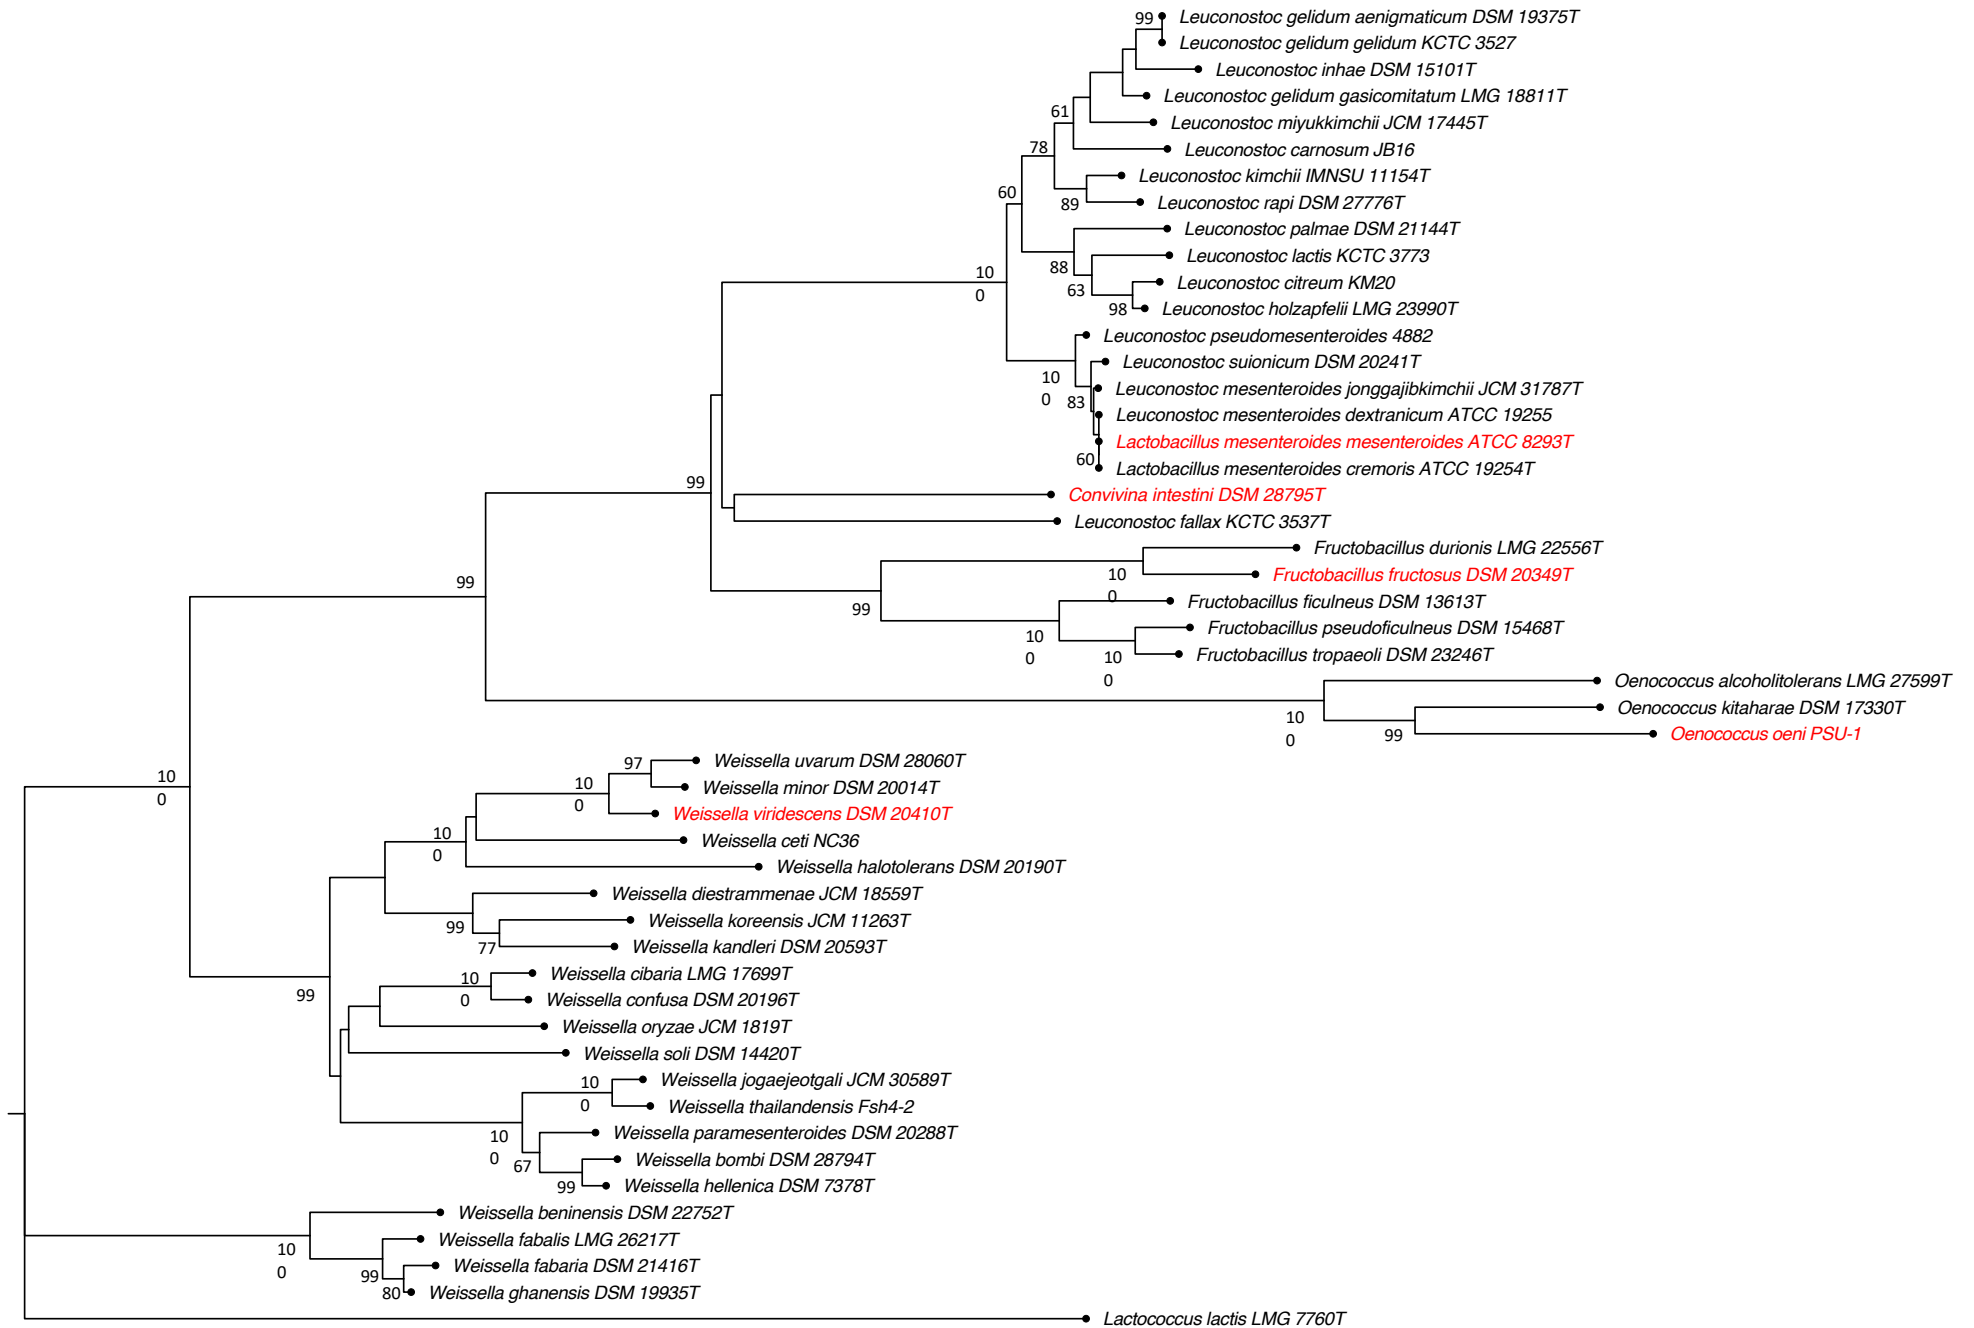

Figure S3L: family Leuconostocaceae

20.0



**Table S1**  
Species considered in the present study and their genome features, including reference phylogroup and carbohydrate fermentation profile.

| Genus                  | Species                          | Strain      | Isolation year | Source                                                | Genome size (Mbp) | GC%   | Phylogroups                       | Metabolic Profiles | Genome Accession No. | 16S rRNA Accession No. | MLST | rMLST | 16s rRNA | AAI | POCP |
|------------------------|----------------------------------|-------------|----------------|-------------------------------------------------------|-------------------|-------|-----------------------------------|--------------------|----------------------|------------------------|------|-------|----------|-----|------|
| <i>Atopobium</i>       | <i>minutum</i>                   | DSM 20886T  | 1937           | Perineal abscess                                      | 1.72              | 48.69 |                                   |                    | JQB000000000         |                        | x    | x     | x        | x   | x    |
| <i>Atopobium</i>       | <i>rimae</i>                     | DSM 7090T   | 1991           | Human gingival crevice                                | 1.63              | 1.63  |                                   |                    | JQC000000000         |                        | x    | x     | x        | x   | x    |
| <i>Carnobacterium</i>  | <i>divergens</i>                 | DSM 20623T  | 1984           | Vacuum packaged minced beef                           | 2.59              | 34.95 |                                   |                    | JQBS000000000        |                        | x    | x     | x        | x   | x    |
| <i>Carnobacterium</i>  | <i>malvaromaticum</i>            | DSM 20342T  | 1974           | Milk with rambly flavour                              | 3.76              | 34.31 |                                   |                    | JQB000000000         |                        | x    | x     | x        | x   | x    |
| <i>Corynebacterium</i> | <i>intestini</i>                 | DSM 28795T  | 2015           | Bumble bee gut                                        |                   |       | Leuconostocaceae                  |                    |                      | LK054488               |      |       |          |     |      |
| <i>Fructobacillus</i>  | <i>durionis</i>                  | LMG 2256T   | 2005           | Malayian acid-fermented condiment, tempok             |                   |       | Leuconostocaceae                  |                    |                      | AJ780981               |      |       |          |     |      |
| <i>Fructobacillus</i>  | <i>fructus</i>                   | DSM 13613T  | 2002           | Fig-tree                                              | 1.54              | 43.9  | Leuconostocaceae                  |                    | BBXQ0000000.1        |                        | x    | x     | x        | x   | x    |
| <i>Fructobacillus</i>  | <i>fructosus</i>                 | DSM 20349T  | 1956           | Flowers                                               | 1.48              | 44.56 | Leuconostocaceae                  |                    | JQB100000000         |                        | x    | x     | x        | x   | x    |
| <i>Fructobacillus</i>  | <i>pseudofrucosus</i>            | DSM 15468T  | 2006           | Ripe fig                                              | 1.41              | 44.5  | Leuconostocaceae                  |                    | FNWS0000000.1        |                        | x    | x     | x        | x   | x    |
| <i>Fructobacillus</i>  | <i>tropaeoli</i>                 | DSM 23246T  | 2011           | <i>Tropaeolum majus</i> , a flower                    | 1.69              | 44.2  | Leuconostocaceae                  |                    | BBXT0000000.1        |                        | x    | x     | x        | x   | x    |
| <i>Kandleria</i>       | <i>vitulina</i>                  | DSM 20405T  | 1973           | Calf navel                                            | 2.14              | 35.03 |                                   |                    | JQBL000000000        |                        | x    | x     | x        | x   | x    |
| <i>Lactobacillus</i>   | <i>acetotolerans</i>             | DSM 20749T  | 1986           | Fermented Vinegar Bruth                               | 1.59              | 36.26 | <i>L. delbrueckii</i>             | OHE                | AYZC000000000        |                        | x    | x     | x        | x   | x    |
| <i>Lactobacillus</i>   | <i>acidifarinae</i>              | DSM 19394T  | 2005           | Artisanal wheat sourdough                             | 2.92              | 51.59 | <i>L. buchneri</i>                | OHE                | AZDV000000000        |                        | x    | x     | x        | x   | x    |
| <i>Lactobacillus</i>   | <i>acidophilus</i>               | DSM 15836T  | 1900           | Fermented fish                                        | 2.33              | 39.07 | <i>L. salivarius</i>              | OHE                | AZFD000000000        |                        | x    | x     | x        | x   | x    |
| <i>Lactobacillus</i>   | <i>acidophilus</i>               | DSM 20079T  | 2000           | Human                                                 | 1.95              | 34.59 | <i>L. delbrueckii</i>             | OHE                | AZCS000000000        |                        | x    | x     | x        | x   | x    |
| <i>Lactobacillus</i>   | <i>agilis</i>                    | DSM 20589T  | 1982           | Municipal sewage                                      | 2.06              | 41.74 | <i>L. salivarius</i>              | OHE                | AYYP000000000        |                        | x    | x     | x        | x   | x    |
| <i>Lactobacillus</i>   | <i>alpidus</i>                   | DSM 15385T  | 2000           | Vacuum-packed beef                                    | 1.59              | 36.03 | <i>L. salivarius</i>              | OHE                | AZD000000000         |                        | x    | x     | x        | x   | x    |
| <i>Lactobacillus</i>   | <i>alimentarius</i>              | DSM 20249T  | 1970           | Marinated fish product                                | 2.34              | 35.4  | <i>L. alimentarius</i>            | FHE                | AZDQ000000000        |                        | x    | x     | x        | x   | x    |
| <i>Lactobacillus</i>   | <i>allii</i>                     | JCM 31938T  | 1997           | Scallion kimchi                                       |                   |       | <i>L. alimentarius</i>            | OHO                | CP019221             |                        | x    | x     | x        | x   | x    |
| <i>Lactobacillus</i>   | <i>amylolyticus</i>              | DSM 11664T  | 2019           | Acidified beer wort                                   | 1.54              | 38.24 | <i>L. delbrueckii</i>             | OHO                | AZEP000000000        |                        | x    | x     | x        | x   | x    |
| <i>Lactobacillus</i>   | <i>amylolophilus</i>             | DSM 20533T  | 1981           | Swine waste-corn fermentation                         | 1.56              | 43.61 | <i>L. delbrueckii</i>             | OHO                | AYYS000000000        |                        | x    | x     | x        | x   | x    |
| <i>Lactobacillus</i>   | <i>amylotrophicus</i>            | DSM 20534T  | 2006           | Swine waste-corn fermentation                         | 1.55              | 43.59 | <i>L. delbrueckii</i>             | OHO                | AZCV000000000        |                        | x    | x     | x        | x   | x    |
| <i>Lactobacillus</i>   | <i>amylotrophicus</i>            | DSM 20531T  | 1981           | Cattle waste-corn fermentation                        | 2.02              | 37.77 | <i>L. delbrueckii</i>             | OHO                | AZCM000000000        |                        | x    | x     | x        | x   | x    |
| <i>Lactobacillus</i>   | <i>animalis</i>                  | DSM 28602T  | 1983           | Dental plaque of baboon                               | 1.89              | 41.06 | <i>L. salivarius</i>              | OHO                | AYYW000000000        |                        | x    | x     | x        | x   | x    |
| <i>Lactobacillus</i>   | <i>antri</i>                     | DSM 16041T  | 2005           | Gastric biopsis, Human stomach mucosa                 | 2.24              | 51.11 | <i>L. reuteri-vaccinostercus</i>  | OHE                | AZDK000000000        |                        | x    | x     | x        | x   | x    |
| <i>Lactobacillus</i>   | <i>apiformis</i>                 | DSM 26257T  | 2014           | Honey stomach of the honeybee                         | 1.46              | 34.9  | <i>L. buchneri</i>                | OHE                | JXC00000000.1        |                        | x    | x     | x        | x   | x    |
| <i>Lactobacillus</i>   | <i>apis</i>                      | Hma11       | 2014           | Stomach of honeybees                                  | 1.70              | 36.85 | <i>L. delbrueckii</i>             | OHO                | JXLG0000000.1        |                        | x    | x     | x        | x   | x    |
| <i>Lactobacillus</i>   | <i>apodemi</i>                   | DSM 16634T  | 2006           | Faeces of wild Japanese wood mouse                    | 2.10              | 38.63 | <i>L. salivarius</i>              | FHE                | AZFT000000000        |                        | x    | x     | x        | x   | x    |
| <i>Lactobacillus</i>   | <i>aquaticus</i>                 | DSM 21051T  | 2009           | Surface of a eutrophic freshwater pond                | 2.41              | 37.41 | <i>L. salivarius</i>              | OHO                | AYZD000000000        |                        | x    | x     | x        | x   | x    |
| <i>Lactobacillus</i>   | <i>avarius araffinus</i>         | DSM 20653T  | 1986           | Intestine of chicken                                  | 1.48              | 38.13 | <i>L. salivarius</i>              | OHO                | AYYZ000000000        |                        | x    | x     | x        | x   | x    |
| <i>Lactobacillus</i>   | <i>avarius avarius</i>           | DSM 20655T  | 1985           | Faeces of chicken                                     | 1.68              | 40.12 | <i>L. salivarius</i>              | OHO                | AZVA000000000        |                        | x    | x     | x        | x   | x    |
| <i>Lactobacillus</i>   | <i>bucchi</i>                    | DSM 18080T  | 2013           | Spoiled lager beer                                    | 1.88              | 40.12 | <i>L. coryniformis</i>            | OHO                |                      | AB779648               | x    | x     | x        | x   | x    |
| <i>Lactobacillus</i>   | <i>byfermentans</i>              | DSM 20003T  | 1943           | Blown cheese                                          | 3.14              | 44.29 | <i>L. coryniformis</i>            | FHE                | AZDA000000000        |                        | x    | x     | x        | x   | x    |
| <i>Lactobacillus</i>   | <i>bombi</i>                     | DSM 26517T  | 2014           | Digestive tract of laboratory-reared bumblebee queens |                   |       | <i>L. alimentarius</i>            | FHE                |                      | KJ078643               | x    | x     | x        | x   | x    |
| <i>Lactobacillus</i>   | <i>bombicola</i>                 | DSM 28793T  | 2015           | Bumble bee gut                                        | 1.93              | 47.48 | <i>L. delbrueckii</i>             | FHE                |                      | LK054485               | x    | x     | x        | x   | x    |
| <i>Lactobacillus</i>   | <i>brunae</i>                    | DSM 23927T  | 2012           | Faeces of Canada goose                                | 2.47              | 45.96 | <i>L. casei</i>                   | OHE                | AYZQ000000000        |                        | x    | x     | x        | x   | x    |
| <i>Lactobacillus</i>   | <i>brevis</i>                    | DSM 20054T  | 1919           | Faeces                                                | 2.47              | 45.96 | <i>L. buchneri</i>                | OHE                | AZCP000000000        |                        | x    | x     | x        | x   | x    |
| <i>Lactobacillus</i>   | <i>buchneri</i>                  | DSM 20057T  | 1983           | Tomato pulp                                           | 2.45              | 44.41 | <i>L. buchneri</i>                | OHE                | AZDM000000000        |                        | x    | x     | x        | x   | x    |
| <i>Lactobacillus</i>   | <i>cacaoman</i>                  | DSM 21116T  | 2009           | Cocoa bean heap fermentation                          | 1.92              | 33.87 | <i>L. salivarius</i>              | FHE                | AYZE000000000        |                        | x    | x     | x        | x   | x    |
| <i>Lactobacillus</i>   | <i>camelliae</i>                 | DSM 22697T  | 2007           | Fermented tea leaves (mian)                           | 2.57              | 55.39 | <i>L. casei</i>                   | OHO                | AYZJ000000000        |                        | x    | x     | x        | x   | x    |
| <i>Lactobacillus</i>   | <i>capillans</i>                 | DSM 19910T  | 2008           | Fermented brine used for stinky tofu production       | 2.24              | 37.63 | <i>L. salivarius</i>              | OHO                | AZEF000000000        |                        | x    | x     | x        | x   | x    |
| <i>Lactobacillus</i>   | <i>casei</i>                     | DSM 20011T  | 1916           | Cheese                                                | 2.83              | 46.45 | <i>L. casei</i>                   | FHE                | AZCC000000000        |                        | x    | x     | x        | x   | x    |
| <i>Lactobacillus</i>   | <i>curvise</i>                   | DSM 100239T | 2017           | Oval cavity of a home-bred ant on rice                |                   |       | <i>L. reuteri-vaccinostercus</i>  | OHE                |                      | KT34143                | x    | x     | x        | x   | x    |
| <i>Lactobacillus</i>   | <i>ceresivariae</i>              | DSM 100836T | 2017           | Spoiled beer                                          |                   |       | <i>L. buchneri</i>                | n.d.               |                      | KT448596               | x    | x     | x        | x   | x    |
| <i>Lactobacillus</i>   | <i>cepii</i>                     | DSM 22408T  | 2008           | Lungs of a beaked whale                               | 1.40              | 33.73 | <i>L. salivarius</i>              | FHE                | JQBZ000000000        |                        | x    | x     | x        | x   | x    |
| <i>Lactobacillus</i>   | <i>colosohominis</i>             | 101-4-CHN   | 2009           | Vaginal urogenital tract                              | 1.72              | 41.1  | <i>L. reuteri-vaccinostercus</i>  | FHE                | AC0H0000000.1        |                        | x    | x     | x        | x   | x    |
| <i>Lactobacillus</i>   | <i>coli</i>                      | DSM 101872T | 2017           | Northern Bobwhite ( <i>Coturnix virginianus</i> )     |                   |       | <i>L. delbrueckii</i>             | n.d.               |                      | KU161105               | x    | x     | x        | x   | x    |
| <i>Lactobacillus</i>   | <i>collinoides</i>               | DSM 20515T  | 1972           | Fermenting apple juice                                | 3.62              | 46.11 | <i>L. buchneri</i>                | OHE                | AYYR000000000        |                        | x    | x     | x        | x   | x    |
| <i>Lactobacillus</i>   | <i>compositi</i>                 | DSM 18527T  | 2007           | Composting material of distilled shochu residue       | 3.47              | 43.95 | <i>L. perolens</i>                | FHE                | AZGA000000000        |                        | x    | x     | x        | x   | x    |
| <i>Lactobacillus</i>   | <i>convexus</i>                  | DSM 17758T  | 2005           | Walls of a distilled spirit fermenting cellar         | 1.90              | 43.3  | <i>L. convexus-L. dextrinicus</i> | OHO                | AZFX000000000        |                        | x    | x     | x        | x   | x    |
| <i>Lactobacillus</i>   | <i>coryniformis coryniformis</i> | DSM 20001T  | 1965           | Silage                                                | 2.71              | 42.86 | <i>L. coryniformis</i>            | FHE                | AZCN000000000        |                        | x    | x     | x        | x   | x    |
| <i>Lactobacillus</i>   | <i>coryniformis torquens</i>     | DSM 20004T  | 1965           | Air of cow shed                                       | 4.28              | 42.94 | <i>L. coryniformis</i>            | FHE                | AZDC000000000        |                        | x    | x     | x        | x   | x    |
| <i>Lactobacillus</i>   | <i>crispus</i>                   | DSM 20584T  | 1953           | Wheat                                                 | 2.06              | 36.59 | <i>L. delbrueckii</i>             | OHO                | AZCW000000000        |                        | x    | x     | x        | x   | x    |
| <i>Lactobacillus</i>   | <i>crustorum</i>                 | JCM 15951T  | 2007           | Wheat sourdough                                       | 2.22              | 35    | <i>L. alimentarius</i>            | OHO                |                      |                        | x    | x     | x        | x   | x    |
| <i>Lactobacillus</i>   | <i>curvise</i>                   | JCM 18524T  | 2013           | Stinky tofu brine                                     | 2.10              | 39.8  | <i>L. buchneri</i>                | OHE                | CP01896.1            |                        | x    | x     | x        | x   | x    |
| <i>Lactobacillus</i>   | <i>curvise</i>                   | JCM31185T   | 2017           | Beer                                                  |                   |       | <i>L. rossiae-L. vilginsii</i>    | n.d.               |                      | LC093898               | x    | x     | x        | x   | x    |
| <i>Lactobacillus</i>   | <i>curvise</i>                   | DSM 20019T  | 1913           | Milk                                                  | 1.82              | 41.97 | <i>L. buchneri</i>                | OHE                | AZDL000000000        |                        | x    | x     | x        | x   | x    |
| <i>Lactobacillus</i>   | <i>delbrueckii bulgaricus</i>    | DSM 20081T  | 1909           | Bulgarian vouhotur                                    | 1.76              | 49.91 | <i>L. delbrueckii</i>             | FHE                | QJAV000000000        |                        | x    | x     | x        | x   | x    |
| <i>Lactobacillus</i>   | <i>delbrueckii delbrueckii</i>   | DSM 20074T  | 1896           | Sour cream mash                                       | 1.75              | 49.86 | <i>L. delbrueckii</i>             | OHO                | AZCR000000000        |                        | x    | x     | x        | x   | x    |
| <i>Lactobacillus</i>   | <i>delbrueckii indicus</i>       | DSM 15966T  | 2005           | Traditional dairy fermented product (Dahi tova)       | 1.88              | 49.54 | <i>L. delbrueckii</i>             | OHO                | AZFL000000000        |                        | x    | x     | x        | x   | x    |
| <i>Lactobacillus</i>   | <i>delbrueckii jakobeni</i>      | DSM 26046T  | 2013           | Dolo wort (Alcoholic fermented beverage)              | 1.75              | 50.31 | <i>L. delbrueckii</i>             | OHO                | JQCG000000000        |                        | x    | x     | x        | x   | x    |
| <i>Lactobacillus</i>   | <i>delbrueckii lactis</i>        | DSM 20072T  | 1919           | Emmental cheese                                       | 1.87              | 49.86 | <i>L. delbrueckii</i>             | OHO                | AZDE000000000        |                        | x    | x     | x        | x   | x    |
| <i>Lactobacillus</i>   | <i>delbrueckii sankii</i>        | DSM 24966T  | 2012           | Sauki, a Japanese traditional pickle                  |                   |       | <i>L. delbrueckii</i>             | OHO                |                      | AB641833               | x    | x     | x        | x   | x    |
| <i>Lactobacillus</i>   | <i>dextrinicus</i>               | DSM 20335T  | 1964           | Silage                                                | 1.81              | 38.05 | <i>L. convexus-L. dextrinicus</i> | OHE                | AYYK000000000        |                        | x    | x     | x        | x   | x    |
| <i>Lactobacillus</i>   | <i>dilatiorans</i>               | DSM 14421T  | 2002           | Maize silage                                          | 2.02              | 40.01 | <i>L. buchneri</i>                | OHO                | AZYZ000000000        |                        | x    | x     | x        | x   | x    |
| <i>Lactobacillus</i>   | <i>equi</i>                      | DSM 15833T  | 2002           | Faeces of horses                                      | 3.90              | 39.03 | <i>L. salivarius</i>              | OHO                | AZFH000000000        |                        | x    | x     | x        | x   | x    |
| <i>Lactobacillus</i>   | <i>equicursoris</i>              | DSM 19284T  | 2010           | Healthy thoroughbred racehorse                        | 2.05              | 47.71 | <i>L. delbrueckii</i>             | OHO                | AZDU000000000        |                        | x    | x     | x        | x   | x    |
| <i>Lactobacillus</i>   | <i>equigenensis</i>              | DSM 18793T  | 2008           | Faeces of thoroughbred horse                          | 1.60              | 42.65 | <i>L. reuteri-vaccinostercus</i>  | OHE                | AZGC000000000        |                        | x    | x     | x        | x   | x    |
| <i>Lactobacillus</i>   | <i>fabifermentans</i>            | DSM 21115T  | 2009           | Cocoa bean heap fermentation                          | 3.28              | 45.03 | <i>L. plantarum</i>               | FHE                | AYGX000000000        |                        | x    | x     | x        | x   | x    |
| <i>Lactobacillus</i>   | <i>faecis</i>                    | DSM 23956T  | 2013           | Animal faeces                                         |                   |       | <i>L. salivarius</i>              | OHO                |                      | AB812750               | x    | x     | x        | x   | x    |
| <i>Lactobacillus</i>   | <i>farcinicus</i>                | DSM 20184T  | 1970           | Sausage                                               | 2.48              | 36.38 | <i>L. alimentarius</i>            | OHO                | AZDR000000000        |                        | x    | x     | x        | x   | x    |
| <i>Lactobacillus</i>   | <i>farraginis</i>                | DSM 18382T  | 2007           | Composting material of distilled shochu residue       | 2.86              | 42.05 | <i>L. buchneri</i>                | FHE                | AZFY000000000        |                        | x    | x     | x        | x   | x    |
| <i>Lactobacillus</i>   | <i>fermentum</i>                 | DSM 20055T  | 1901           | Human saliva                                          | 1.90              | 52.42 | <i>L. reuteri-vaccinostercus</i>  | OHE                | JQAU000000000        |                        | x    | x     | x        | x   | x    |
| <i>Lactobacillus</i>   | <i>floricola</i>                 | DSM 23037T  | 2011           | Flower of <i>Caltha palustris</i>                     | 1.29              | 34.53 | <i>L. delbrueckii</i>             | OHO                | AYZL000000000        |                        | x    | x     | x        | x   | x    |
| <i>Lactobacillus</i>   | <i>florum</i>                    | DSM 22689T  | 2010           | Penny ( <i>Poaonia sulfarificosa</i> )                | 1.35              | 41.14 | <i>L. buchneri</i>                | OHE                |                      |                        |      |       |          |     |      |

|                                                            |               |      |                                                                        |       |                 |                                 |             |               |   |   |   |   |   |
|------------------------------------------------------------|---------------|------|------------------------------------------------------------------------|-------|-----------------|---------------------------------|-------------|---------------|---|---|---|---|---|
| <i>Lactobacillus intestinalis</i>                          | DSM 6629T     | 1974 | Intestine of rat                                                       | 2.01  | 35.37           | <i>L. delbrueckii</i>           | FHE         | AZGN0000000   | x | x | x | x | x |
| <i>Lactobacillus ivanensis</i>                             | DSM 26942T    | 2013 | Ochadragrus ( <i>Chrysothrix glomerata</i> L.) silage                  |       |                 | <i>L. coryniformis</i>          | OHO         | AB773428      |   |   |   |   |   |
| <i>Lactobacillus itorae</i>                                | LMG 29008T    | 1976 | Flower (West-Indian tamarac)                                           |       |                 | <i>L. buchneri</i>              | OHE         | LC094494      |   |   |   |   |   |
| <i>Lactobacillus jensenii</i>                              | DSM 20557T    | 2010 | Human vaginal discharge                                                | 1.61  | 34.33           | <i>L. delbrueckii</i>           | FHE         | AYYU0000000   | x | x | x | x | x |
| <i>Lactobacillus johnsonii</i>                             | ATCC 33200T   | 1992 | Human blood                                                            | 1.77  | 34.43           | <i>L. delbrueckii</i>           | OHO         | AZCY0000000   | x | x | x | x | x |
| <i>Lactobacillus kaltenzisi</i>                            | DSM 16043T    | 2005 | Human stomach                                                          | 2.08  | 36.1            | <i>L. delbrueckii</i>           | OHO         | AZFM0000000   | x | x | x | x | x |
| <i>Lactobacillus kefirranofaciens kefirranofaciens</i>     | DSM 5016T     | 1988 | Kefir grains                                                           | 2.26  | 37.22           | <i>L. delbrueckii</i>           | OHO         | AZGG0000000   | x | x | x | x | x |
| <i>Lactobacillus kefirranofaciens kefirgranum kefir</i>    | DSM 10550T    | 1984 | Kefir grains                                                           | 2.10  | 37.48           | <i>L. delbrueckii</i>           | OHO         | AZEM0000000   | x | x | x | x | x |
| <i>Lactobacillus kimchidii</i>                             | DSM 20587T    | 1993 | Kefir grains                                                           | 2.23  | 41.66           | <i>L. buchneri</i>              | OHE         | AYYV0000000   | x | x | x | x | x |
| <i>Lactobacillus kimchidii</i>                             | DSM 26263T    | 2014 | Honey stomach of the honeybee <i>Apis mellifera</i>                    | 2.19  | 36              | <i>L. delbrueckii</i>           | FHE         | JXLH0000000.1 | x | x | x | x | x |
| <i>Lactobacillus kimchiensis</i>                           | JCM 15530T    | 2008 | Kimchi                                                                 | 2.59  | 46.59           | <i>L. buchneri</i>              | FHE         | AZCC0000000   | x | x | x | x | x |
| <i>Lactobacillus kimchiensis</i>                           | DSM 24716T    | 2013 | Kimchi                                                                 | 2.70  | 35.48           | <i>L. alimentarius</i>          | OHO         | JQCF0000000   | x | x | x | x | x |
| <i>Lactobacillus kisomensis</i>                            | DSM 19906T    | 2009 | Sunki, a Japanese traditional pickle                                   | 3.01  | 41.74           | <i>L. buchneri</i>              | OHE         | AZEB0000000   | x | x | x | x | x |
| <i>Lactobacillus kitatanensis</i>                          | DSM 16761T    | 2003 | Chicken intestine                                                      | 1.91  | 37.51           | <i>L. delbrueckii</i>           | FHE         | AZFU0000000   | x | x | x | x | x |
| <i>Lactobacillus koreensis</i>                             | JCM 16448T    | 2011 | Cabbage kimchi                                                         | 2.97  | 49.15           | <i>L. buchneri</i>              | OHE         | AZDP0000000   | x | x | x | x | x |
| <i>Lactobacillus kullbergensis</i>                         | DSM 26262T    | 2014 | Honey stomach of the honeybee <i>Apis mellifera</i>                    | 2.12  | 35.8            | <i>L. delbrueckii</i>           | FHE         | JXBY0000000.1 | x | x | x | x | x |
| <i>Lactobacillus kurdici</i>                               | DSM 12361T    | 1998 | Commercial grape wine                                                  | 1.52  | 36.43           | <i>L. buchneri</i>              | OHE         | AZCK0000000   | x | x | x | x | x |
| <i>Lactobacillus lindneri</i>                              | DSM 20690T    | 1901 | Spout beer                                                             | 1.44  | 34.14           | <i>L. buchneri</i>              | OHE         | JQBT0000000   | x | x | x | x | x |
| <i>Lactobacillus malferramentans</i>                       | DSM 5705T     | 1953 | Sour beer                                                              | 2.05  | 41.03           | <i>L. buchneri</i>              | OHE         | AZGG0000000   | x | x | x | x | x |
| <i>Lactobacillus mali</i>                                  | DSM 20444T    | 1970 | Apple juice from cider press                                           | 2.59  | 36.06           | <i>L. salivarius</i>            | OHO         | AYYH0000000   | x | x | x | x | x |
| <i>Lactobacillus manihotivoraans</i>                       | DSM 13343T    | 1998 | Cassava sour starch fermentation                                       | 3.14  | 47.7            | <i>L. casei</i>                 | OHO         | AZEU0000000   | x | x | x | x | x |
| <i>Lactobacillus mellifer</i>                              | Bin8NT        | 2014 | Honey stomach of the honeybee <i>Apis mellifera</i>                    | 1.82  | 39.5            | <i>L. alimentarius</i>          | FHE         | JXJQ0000000.1 | x | x | x | x | x |
| <i>Lactobacillus mellis</i>                                | DSM 26255T    | 2014 | Honey stomach of the honeybee <i>Apis mellifera</i>                    | 1.81  | 36.4            | <i>L. alimentarius</i>          | FHE         | JXHZ0000000.1 | x | x | x | x | x |
| <i>Lactobacillus melliveneris</i>                          | Hma8NT        | 2014 | Honey stomach of the honeybee <i>Apis mellifera</i>                    | 2.12  | 35.9            | <i>L. delbrueckii</i>           | FHE         | JXLI0000000.1 | x | x | x | x | x |
| <i>Lactobacillus mindensis</i>                             | DSM 14500T    | 2003 | Sourdough                                                              | 2.34  | 38.21           | <i>L. alimentarius</i>          | OHO         | AZEZ0000000   | x | x | x | x | x |
| <i>Lactobacillus mixiphalii</i>                            | DSM 28880T    | 2015 | Silage                                                                 |       |                 | <i>L. buchneri</i>              | OHE         | AB894863      |   |   |   |   |   |
| <i>Lactobacillus modestissoliterans</i>                    | NBRC 107235T  | 2015 | Traditional fermented foods                                            |       |                 | <i>L. plantarum</i>             | OHO         | AB907192      |   |   |   |   |   |
| <i>Lactobacillus mucosae</i>                               | DSM 13345T    | 2000 | Pig small intestine                                                    | 2.25  | 46.4            | <i>L. reuteri-vaccinosciens</i> | OHE         | AZEQ0000000   | x | x | x | x | x |
| <i>Lactobacillus midjungensis</i>                          | LMG 27194T    | 2013 | Chinese traditional pickle and sourdough                               |       |                 | <i>L. plantarum</i>             | OHO         | HF679037      |   |   |   |   |   |
| <i>Lactobacillus murinus</i>                               | DSM 20452T    | 1982 | Intestine of rat                                                       | 2.20  | 40.05           | <i>L. salivarius</i>            | FHE         | AYYN0000000   | x | x | x | x | x |
| <i>Lactobacillus musae</i>                                 | NBRC 112868T  | 2017 | Banana fruits                                                          |       |                 | <i>L. alimentarius</i>          | OHO         | LC184607      |   |   |   |   |   |
| <i>Lactobacillus nagelii</i>                               | DSM 13675T    | 2007 | Partially fermented wine                                               | 2.50  | 36.69           | <i>L. salivarius</i>            | OHO         | AZEV0000000   | x | x | x | x | x |
| <i>Lactobacillus namurensis</i>                            | DSM 19117T    | 2000 | Sourdough                                                              | 2.48  | 51.99           | <i>L. buchneri</i>              | OHE         | AZDT0000000   | x | x | x | x | x |
| <i>Lactobacillus nanensis</i>                              | DSM 16982T    | 2006 | Wheat sourdough                                                        | 2.91  | 36.18           | <i>L. alimentarius</i>          | FHE         | AZFW0000000   | x | x | x | x | x |
| <i>Lactobacillus nasusensis</i>                            | JCM 17158T    | 2012 | Saundergs silage sample                                                | 2.28  | 57.02           | <i>L. casei</i>                 | OHO         | AZDV0000000   | x | x | x | x | x |
| <i>Lactobacillus nenjiangensis</i>                         | LMG 27192T    | 2013 | Chinese traditional pickle and sourdough                               |       |                 | <i>L. reuteri-vaccinosciens</i> | OHE         | HF679039      |   |   |   |   |   |
| <i>Lactobacillus nodensis</i>                              | DSM 19682T    | 2009 | Japanese pickles                                                       | 2.68  | 37.57           | <i>L. alimentarius</i>          | FHE         | AZDZ0000000   | x | x | x | x | x |
| <i>Lactobacillus odoratofufi</i>                           | DSM 19909T    | 2010 | Fermented brine used for stinky tofu production                        | 2.76  | 44.25           | <i>L. buchneri</i>              | OHE         | AZEE0000000   | x | x | x | x | x |
| <i>Lactobacillus oeni</i>                                  | DSM 19972T    | 2009 | Bobal wine                                                             | 2.12  | 37.33           | <i>L. salivarius</i>            | OHO         | AZEH0000000   | x | x | x | x | x |
| <i>Lactobacillus oligofermentans oris</i>                  | DSM 15707T    | 2005 | Bowler tea                                                             | 1.83  | 35.57           | <i>L. reuteri-vaccinosciens</i> | OHO         | AZEF0000000   | x | x | x | x | x |
| <i>Lactobacillus oryzae</i>                                | DSM 4064T     | 1988 | Human saliva                                                           | 2.03  | 42.98           | <i>L. reuteri-vaccinosciens</i> | OHE         | AZEG0000000   | x | x | x | x | x |
| <i>Lactobacillus oryzae</i>                                | JCM 18671T    | 2013 | Fermented rice grain ( <i>Oryza sativa</i> L. subsp. <i>japonica</i> ) | 1.85  | 42.8            | <i>L. buchneri</i>              | OHE         | BBM0000000.1  | x | x | x | x | x |
| <i>Lactobacillus otakiensis</i>                            | DSM 19908T    | 2009 | Sunki, a Japanese traditional pickle                                   | 2.35  | 42.39           | <i>L. buchneri</i>              | OHE         | AZED0000000   | x | x | x | x | x |
| <i>Lactobacillus oceanis</i>                               | DSM 23829T    | 2011 | Chrysanthemum, Oze National Park                                       | 1.48  | 31.93           | <i>L. buchneri</i>              | OHE         | AYYQ0000000   | x | x | x | x | x |
| <i>Lactobacillus panis</i>                                 | DSM 6035T     | 1996 | Sourdough                                                              | 2.01  | 48.05           | <i>L. reuteri-vaccinosciens</i> | OHE         | AZGM0000000   | x | x | x | x | x |
| <i>Lactobacillus pasteurii</i>                             | DSM 15945T    | 2002 | Jaunar faeces                                                          | 2.55  | 52.9            | <i>L. casei</i>                 | OHO         | AZJF0000000   | x | x | x | x | x |
| <i>Lactobacillus parabrevis</i>                            | ATCC 53295T   | 2006 | Cheese                                                                 | 2.61  | 49.05           | <i>L. buchneri</i>              | OHE         | AZJZ0000000   | x | x | x | x | x |
| <i>Lactobacillus parabuchneri</i>                          | DSM 15322T    | 1989 | Blair alcohol distillery                                               | 2.61  | 43.47           | <i>L. buchneri</i>              | OHE         | JQB0000000    | x | x | x | x | x |
| <i>Lactobacillus paracasei paracasei</i>                   | DSM 5622T     | 1989 | N/A                                                                    | 2.88  | 46.5            | <i>L. casei</i>                 | FHE         | AZGH0000000   | x | x | x | x | x |
| <i>Lactobacillus paracasei tolerans paracasei/tolerans</i> | DSM 20258T    | 1965 | Pasteurized milk                                                       | 2.38  | 46.42           | <i>L. casei</i>                 | FHE         | AYYU0000000   | x | x | x | x | x |
| <i>Lactobacillus paracollinoides</i>                       | DSM 15502T    | 2004 | Brewery environment                                                    | 3.49  | 46.84           | <i>L. buchneri</i>              | OHE         | AZJW0000000   | x | x | x | x | x |
| <i>Lactobacillus paraferruginis</i>                        | DSM 18390T    | 2007 | Composting material of distilled sludges residue                       | 3.08  | 45.23           | <i>L. buchneri</i>              | FHE         | AZJX0000000   | x | x | x | x | x |
| <i>Lactobacillus parakefiri</i>                            | DSM 10551T    | 1994 | Kefir grain                                                            | 4.91  | 42.59           | <i>L. buchneri</i>              | OHE         | AZJN0000000   | x | x | x | x | x |
| <i>Lactobacillus paraimentarius</i>                        | DSM 12383T    | 1999 | Saundergs silage                                                       | 2.55  | 35.1            | <i>L. alimentarius</i>          | FHE         | AZJS0000000   | x | x | x | x | x |
| <i>Lactobacillus pasteurii</i>                             | DSM 10667T    | 1996 | Beer contaminant                                                       | 3.40  | 43.69           | <i>L. plantarum</i>             | FHE         | AZEC0000000   | x | x | x | x | x |
| <i>Lactobacillus pasteurii</i>                             | DSM 23907T    | 2010 | N/A                                                                    | 1.87  | 38.51           | <i>L. delbrueckii</i>           | FHE         | AZYN0000000   | x | x | x | x | x |
| <i>Lactobacillus pasteurianus</i>                          | DSM 22467T    | 2013 | Yeast storage tank containing laager beer                              | 2.37  | 49.06           | <i>L. buchneri</i>              | FHE         | JQC40000000   | x | x | x | x | x |
| <i>Lactobacillus pentosiphilus</i>                         | DSM 10294T    | 1927 | Silage                                                                 | n.d.  |                 | <i>L. buchneri</i>              | n.d.        | LC085284      |   |   |   |   |   |
| <i>Lactobacillus pentosus</i>                              | DSM 20314T    | 1921 | N/A                                                                    | 3.65  | 46.31           | <i>L. plantarum</i>             | FHE         | AZCU0000000   | x | x | x | x | x |
| <i>Lactobacillus perolens</i>                              | DSM 12744T    | 2000 | Onion-lemonade                                                         | 3.31  | 49.08           | <i>L. perolens</i>              | FHE         | AZEC0000000   | x | x | x | x | x |
| <i>Lactobacillus pligioni</i>                              | NBRC 107333T  | 2015 | Traditional fermented foods                                            |       |                 | <i>L. plantarum</i>             | FHE         | AB907190      |   |   |   |   |   |
| <i>Lactobacillus plantarum plantarum</i>                   | CGMCC 1-2437T | 1919 | Pickled cabbage                                                        | 3.21  | 44.48           | <i>L. plantarum</i>             | FHE         | AZEH0000000   | x | x | x | x | x |
| <i>Lactobacillus plantarum argentinensis</i>               | DSM 16365T    | 2005 | Fermented cassava roots (fufu)                                         | 3.20  | 45              | <i>L. plantarum</i>             | FHE         | AZFR0000000   | x | x | x | x | x |
| <i>Lactobacillus plantarum plantarum</i>                   | DSM 13273T    | 1919 | Joboba meal fermentation                                               | 3.45  | 44.24           | <i>L. plantarum</i>             | FHE         | JQAW0000000   | x | x | x | x | x |
| <i>Lactobacillus pobuzhii</i>                              | KCTC 13174T   | 1994 | Pickled cabbage                                                        | 2.35  | 37.72           | <i>L. salivarius</i>            | FHE         | JQCN0000000   | x | x | x | x | x |
| <i>Lactobacillus pontis</i>                                | DSM 8475T     | 2010 | <i>Cor dia diabolus</i>                                                | 1.67  | 53.43           | <i>L. reuteri-vaccinosciens</i> | OHE         | AZGG0000000   | x | x | x | x | x |
| <i>Lactobacillus porcinae</i>                              | LMG 26767T    | 2013 | Traditional Vietnamese non chua                                        |       |                 | <i>L. casei</i>                 | OHE         | HE616585      |   |   |   |   |   |
| <i>Lactobacillus prittici</i>                              | DSM 15354T    | 2001 | Lung of parrot                                                         | 1.54  | 35.64           | <i>L. delbrueckii</i>           | OHE         | AZFB0000000   | x | x | x | x | x |
| <i>Lactobacillus rapi</i>                                  | DSM 19907T    | 2009 | Sunki, a Japanese traditional pickle                                   | 2.86  | 42.95           | <i>L. buchneri</i>              | OHE         | AZED0000000   | x | x | x | x | x |
| <i>Lactobacillus rennini</i>                               | DSM 20253T    | 2006 | Remisin                                                                | 2.27  | 40.67           | <i>L. coryniformis</i>          | FHE         | AYYU0000000   | x | x | x | x | x |
| <i>Lactobacillus reuteri</i>                               | DSM 20016T    | 1982 | Intestine of adult                                                     | 1.94  | 38.63           | <i>L. reuteri-vaccinosciens</i> | OHE         | AZDD0000000   | x | x | x | x | x |
| <i>Lactobacillus rhomus</i>                                | DSM 20021T    | 1988 | N/A                                                                    | 2.95  | 46.68           | <i>L. casei</i>                 | OHE         | AZCQ0000000   | x | x | x | x | x |
| <i>Lactobacillus rodentium</i>                             | DSM 24759T    | 2014 | Digestive tract of wild rodents                                        |       |                 | <i>L. delbrueckii</i>           | OHO         | HQ851022      |   |   |   |   |   |
| <i>Lactobacillus rossiae</i>                               | DSM 15814T    | 2005 | Wheat sourdough                                                        | 2.87  | 45.34           | <i>L. rossiae-L. siliginis</i>  | OHE         | AZTF0000000   | x | x | x | x | x |
| <i>Lactobacillus rosalia</i>                               | DSM 20403T    | 1973 | Bovine rumen                                                           | 2.01  | 43.39           | <i>L. salivarius</i>            | OHO         | AYYU0000000   | x | x | x | x | x |
| <i>Lactobacillus rosenmuri</i>                             | DSM 16049T    | 2004 | Pig faeces                                                             | 1.69  | 42.57           | <i>L. salivarius</i>            | OHO         | AZFP0000000   | x | x | x | x | x |
| <i>Lactobacillus sakei carnosus</i>                        | DSM 15831T    | 1996 | Fermented meat product                                                 | 1.99  | 41.02           | <i>L. sakei</i>                 | OHE         | AZFG0000000   | x | x | x | x | x |
| <i>Lactobacillus sakei sakei</i>                           | DSM 20017T    | 1934 | 1.91                                                                   | 41.07 | <i>L. sakei</i> | FHE                             | AZDN0000000 | x             | x | x | x | x |   |
| <i>Lactobacillus salivarius</i>                            | DSM 20555T    | 1953 | Saliva                                                                 | 1.98  | 32.5            | <i>L. salivarius</i>            | FHE         | AYTU0000000   | x | x | x | x | x |
| <i>Lactobacillus saunfencensis</i>                         | DSM 20451T    | 1971 | Sourdough                                                              | 1.23  | 34.7            | <i>L. buchneri</i>              | OHE         | AYYM0000000   | x | x | x | x | x |
| <i>Lactobacillus sanviri</i>                               | DSM 24301T    | 2012 | Faeces of a Japanese healthy adult male                                | 2.44  | 47.73           | <i>L. casei</i>                 | FHE         | JQCE0000000   | x | x | x | x | x |
| <i>Lactobacillus satsumensis</i>                           | DSM 16230T    | 2005 | Shochu mash                                                            | 2.65  | 39.94           | <i>L. salivarius</i>            | OHO         | AZFF0000000   | x | x | x | x | x |
| <i>Lactobacillus scalphilus</i>                            | DSM 17896T    | 2007 | Sourdough                                                              | 1.65  | 47.71           | <i>L. reuteri-vaccinosciens</i> | FHE         | JQBW0000000   | x | x | x | x | x |
| <i>Lactobacillus selangorensis</i>                         | DSM 13344T    | 2002 | Chili bo                                                               | 2.09  | 46.45           |                                 | OHO         | JQAZ0000000   | x | x | x | x | x |
| <i>Lactobacillus senioris</i>                              | DSM 24302T    | 2010 | Faeces of a healthy 100-year-old Japanese female                       | 1.57  | 39.09           |                                 |             |               |   |   |   |   |   |

|                    |                                    |             |      |                                                        |       |       |                  |                      |   |   |   |   |   |
|--------------------|------------------------------------|-------------|------|--------------------------------------------------------|-------|-------|------------------|----------------------|---|---|---|---|---|
| <i>Leuconostoc</i> | <i>carnosum</i>                    | JB16        | 1989 | Kimchi                                                 | 1.77  | 37.13 | Leuconostocaceae | CP003851 - CP003853  | x | x | x | x | x |
| <i>Leuconostoc</i> | <i>citrum</i>                      | KM20        | 2008 | Kimchi                                                 | 1.90  | 38.87 | Leuconostocaceae | DQ489736 - DQ489740  | x | x | x | x | x |
| <i>Leuconostoc</i> | <i>fallax</i>                      | KCTC 3337T  | 1992 | Sauerkraut                                             | 1.64  | 37.53 | Leuconostocaceae | AEEZ000000           | x | x | x | x | x |
| <i>Leuconostoc</i> | <i>gelatum acenigmaticum</i>       | DSM 19375T  | 2014 | Packaged meat                                          |       |       | Leuconostocaceae | KF57569              |   |   |   |   |   |
| <i>Leuconostoc</i> | <i>gelatum gasticomitatum</i>      | LMG 18811T  | 2001 | Tomato-marinated beef                                  | 1.95  | 36.66 | Leuconostocaceae | FNS2274              | x | x | x | x | x |
| <i>Leuconostoc</i> | <i>gelatum gelatum</i>             | KCTC 3327   | 1989 | Vacuum packaged beef                                   | 1.86  | 36.6  | Leuconostocaceae | AEM0000000           | x | x | x | x | x |
| <i>Leuconostoc</i> | <i>holzappelii</i>                 | LMG 23990T  | 2007 | Ethiopian coffee fermentation                          |       |       | Leuconostocaceae | AM600682             |   |   |   |   |   |
| <i>Leuconostoc</i> | <i>inhae</i>                       | DSM 15101T  | 2003 | Kimchi                                                 |       |       | Leuconostocaceae | AF439560             |   |   |   |   |   |
| <i>Leuconostoc</i> | <i>kimchi</i>                      | BNSU 11154T | 2000 | Kimchi                                                 | 2.10  | 37.91 | Leuconostocaceae | CP001751 - CP001758  | x | x | x | x | x |
| <i>Leuconostoc</i> | <i>mesenteroides eremoris</i>      | ATCC 10254T | 1929 | Hanson's dried starter powder                          | 1.74  | 37.9  | Leuconostocaceae | C2KK01               | x | x | x | x | x |
| <i>Leuconostoc</i> | <i>mesenteroides destrianicum</i>  | ATCC 19255  | 1912 | N/A                                                    | 1.85  | 38.04 | Leuconostocaceae | CP01209.1            | x | x | x | x | x |
| <i>Leuconostoc</i> | <i>mesenteroides jonggakkimchi</i> | JCM 31571T  | 2017 | Kimchi                                                 |       |       | Leuconostocaceae | CP014611             | x | x | x | x | x |
| <i>Leuconostoc</i> | <i>mesenteroides mesenteroides</i> | ATCC 8293T  | 1878 | Fermenting olives                                      | 2.08  | 37.67 | Leuconostocaceae | NC_008496, NC_008531 | x | x | x | x | x |
| <i>Leuconostoc</i> | <i>niyukimchi</i>                  | JCM 17445T  | 2012 | Brown algae ( <i>Ulvaria</i> <i>simmatifida</i> )      |       |       | Leuconostocaceae | HQ263024             |   |   |   |   |   |
| <i>Leuconostoc</i> | <i>pulmae</i>                      | DSM 21144T  | 2009 | Palm wine                                              | 2.01  | 39.06 | Leuconostocaceae | AM940225             | x | x | x | x | x |
| <i>Leuconostoc</i> | <i>pseudomesenteroides</i>         | 4882        | N/A  | N/A                                                    |       |       | Leuconostocaceae | CAKV0000000          | x | x | x | x | x |
| <i>Leuconostoc</i> | <i>rapti</i>                       | DSM 2776T   | 2015 | Tumpin-like vegetable                                  |       |       | Leuconostocaceae | HG515542             |   |   |   |   |   |
| <i>Leuconostoc</i> | <i>suonicum</i>                    | DSM 20241T  | 2012 | Sweden                                                 |       |       | Leuconostocaceae | HM443957             |   |   |   |   |   |
| <i>Oenococcus</i>  | <i>alcoholitolerans</i>            | LMG 27599T  | 2015 | Cachaça and ethanol fermentation                       |       |       | Leuconostocaceae | HQ009794             |   |   |   |   |   |
| <i>Oenococcus</i>  | <i>hiatharae</i>                   | DSM 17330T  | 2006 | Distilled residue of shechi mules                      | 1.84  | 42.68 | Leuconostocaceae | AFVZ0000000          | x | x | x | x | x |
| <i>Oenococcus</i>  | <i>oeni</i>                        | PSU-1       | 1972 | Spontaneous malolactic fermentation                    | 19.10 | 37.9  | Leuconostocaceae | CP000411.1           | x | x | x | x | x |
| <i>Olecella</i>    | <i>ali</i>                         | DSM 7084T   | 1991 | Human gingival crevice                                 | 2.06  | 64.69 | Leuconostocaceae | JQC00000000          | x | x | x | x | x |
| <i>Pediosoccus</i> | <i>acidilactici</i>                | ASL 2696    | N/A  | N/A                                                    | 1.93  | 42.13 | Leuconostocaceae | JQAQ0000000          | x | x | x | x | x |
| <i>Pediosoccus</i> | <i>argentinicus</i>                | DSM 23026T  | 2008 | Fermented wheat flour                                  | 1.76  | 36.67 | Leuconostocaceae | JQCQ0000000          | x | x | x | x | x |
| <i>Pediosoccus</i> | <i>cellicola</i>                   | DSM 17757T  | 2005 | Distilled pits-fermenting cellar                       | 2.04  | 39.04 | Leuconostocaceae | JBEB00000000         | x | x | x | x | x |
| <i>Pediosoccus</i> | <i>clausenii</i>                   | DSM 14800T  | 2002 | Spoiled beer                                           | 1.88  | 36.74 | Leuconostocaceae | JBEB00000000         | x | x | x | x | x |
| <i>Pediosoccus</i> | <i>damnosus</i>                    | DSM 20531T  | 1903 | Lager beer yeast                                       | 2.19  | 38.23 | Leuconostocaceae | JBEB00000000         | x | x | x | x | x |
| <i>Pediosoccus</i> | <i>ethanolitolerans</i>            | DSM 22301T  | 2006 | Walls of a distilled spirit-fermenting cellar          | 2.26  | 37.18 | Leuconostocaceae | JBVY00000000         | x | x | x | x | x |
| <i>Pediosoccus</i> | <i>inguinatus</i>                  | DSM 20285T  | 1988 | Brewery yeast                                          | 2.11  | 38.61 | Leuconostocaceae | JBBC00000000         | x | x | x | x | x |
| <i>Pediosoccus</i> | <i>loli</i>                        | DSM 19927T  | 1887 | Ryegrass silage                                        | 2.04  | 42.13 | Leuconostocaceae | JQC00000000          | x | x | x | x | x |
| <i>Pediosoccus</i> | <i>parvulus</i>                    | DSM 20332T  | 1961 | Silage                                                 | 3.99  | 40.38 | Leuconostocaceae | JBEB00000000         | x | x | x | x | x |
| <i>Pediosoccus</i> | <i>pentosacens</i>                 | DSM 20336T  | 1934 | Dried American beer yeast                              | 1.74  | 37.25 | Leuconostocaceae | JBFB00000000         | x | x | x | x | x |
| <i>Pediosoccus</i> | <i>stilicii</i>                    | DSM 18001T  | 2006 | White maize grains                                     | 1.84  | 38.11 | Leuconostocaceae | JBEX00000000         | x | x | x | x | x |
| <i>Weissella</i>   | <i>beniensis</i>                   | DSM 22752T  | 2010 | Cassava fermentations                                  |       |       | Leuconostocaceae | EU439435             |   |   |   |   |   |
| <i>Weissella</i>   | <i>bombi</i>                       | DSM 28794T  | 2015 | Bumble bee gut                                         |       |       | Leuconostocaceae | LK054487             |   |   |   |   |   |
| <i>Weissella</i>   | <i>ceti</i>                        | NC36        | 2014 | Farmed rainbow trout                                   | 1.35  | 40.8  | Leuconostocaceae | ANCA0000000.1        | x | x | x | x | x |
| <i>Weissella</i>   | <i>cibaria</i>                     | LMG 17699T  | 2002 | Food and clinical samples                              | 2.32  | 45.1  | Leuconostocaceae | AEK101000001         | x | x | x | x | x |
| <i>Weissella</i>   | <i>confusa</i>                     | DSM 20196T  | 1969 | Sugar cane                                             | 2.22  | 44.73 | Leuconostocaceae | JQAY00000000         | x | x | x | x | x |
| <i>Weissella</i>   | <i>diestrannenae</i>               | JCM 18559T  | 2013 | Gut of a camel cricket ( <i>Diestrannona coreana</i> ) |       |       | Leuconostocaceae | JQ646523             |   |   |   |   |   |
| <i>Weissella</i>   | <i>fabalis</i>                     | LMG 26217T  | 2013 | Cocoa bean fermentations                               |       |       | Leuconostocaceae | HE576795             |   |   |   |   |   |
| <i>Weissella</i>   | <i>fabaria</i>                     | DSM 21416T  | 2010 | Ghanaian cocoa fermentation                            |       |       | Leuconostocaceae | FM179678             |   |   |   |   |   |
| <i>Weissella</i>   | <i>ghansensis</i>                  | DSM 19935T  | 2008 | Ghanaian cocoa fermentation                            |       |       | Leuconostocaceae | AM882997             |   |   |   |   |   |
| <i>Weissella</i>   | <i>halotolerans</i>                | DSM 20190T  | 1983 | Sausage                                                | 1.37  | 43.06 | Leuconostocaceae | JQAX00000000         | x | x | x | x | x |
| <i>Weissella</i>   | <i>holmae</i>                      | DSM 7378T   | 1994 | Fermented sausages                                     | 1.82  | 36.9  | Leuconostocaceae | NZ_FJAW0000000       | x | x | x | x | x |
| <i>Weissella</i>   | <i>jogajjogajjogali</i>            | JCM 30589T  | 2015 | Jogje joggal, Korean fermented food                    |       |       | Leuconostocaceae | KP027016             |   |   |   |   |   |
| <i>Weissella</i>   | <i>landleri</i>                    | DSM 20593T  | 1983 | Digest serum                                           | 1.33  | 39.67 | Leuconostocaceae | JBEP00000000         | x | x | x | x | x |
| <i>Weissella</i>   | <i>koreensis</i>                   | JCM 11263T  | 2002 | Kimchi                                                 | 1.73  | 35.5  | Leuconostocaceae | AKGG0000000.1        | x | x | x | x | x |
| <i>Weissella</i>   | <i>minor</i>                       | DSM 20014T  | 1983 | Milking machine slime                                  | 1.77  | 39.29 | Leuconostocaceae | JQC00000000          | x | x | x | x | x |
| <i>Weissella</i>   | <i>oryzae</i>                      | JCM 1819T   | 2013 | Fermented rice grains                                  | 2.13  | 38.9  | Leuconostocaceae |                      | x | x | x | x | x |
| <i>Weissella</i>   | <i>paramesenteroides</i>           | DSM 20288T  | 1993 | Fermented sausages                                     | 1.98  | 38    | Leuconostocaceae | ACKL0000000.1        | x | x | x | x | x |
| <i>Weissella</i>   | <i>soli</i>                        | DSM 14420T  | 2002 | Soil                                                   |       |       | Leuconostocaceae | AV028260             |   |   |   |   |   |
| <i>Weissella</i>   | <i>thailandensis</i>               | Fsb4-2      | 2000 | Korean fermented seafood                               | 1.97  | 40    | Leuconostocaceae | HE575133-HE575182    | x | x | x | x | x |
| <i>Weissella</i>   | <i>uvorum</i>                      | DSM 20000T  | 2014 | Wine grapes                                            |       |       | Leuconostocaceae | KF999666             |   |   |   |   |   |
| <i>Weissella</i>   | <i>viridescens</i>                 | DSM 20410T  | 1957 | Cured meat products                                    | 1.54  | 41.09 | Leuconostocaceae | JBEM00000000         | x | x | x | x | x |

**Table S2**

Sequence information for the 29 ribosomal proteins and 12 phylogenetic markers.

**Genes MLST**

| <i>L. salivarius</i> |          |          |                                            |                  |         |
|----------------------|----------|----------|--------------------------------------------|------------------|---------|
| UCC118 locus         |          |          |                                            |                  |         |
| Gene                 | tag*     | COG      | Annotation                                 | Co-ordinates*    | Length* |
| <i>dnaK</i>          | LSL_0578 | COG0443O | Chaperone protein                          | 619577..621424   | 1848    |
| <i>fusA</i>          | LSL_0202 | COG0480J | Protein Translation Elongation Factor G    | 244403..246496   | 2094    |
| <i>groEL</i>         | LSL_1211 | COG0459O | Molecular chaperone GroEL                  | 1246385..1248007 | 1623    |
| <i>gyrA</i>          | LSL_0006 | COG0188L | DNA gyrase subunit A                       | 6446..8998       | 2553    |
| <i>gyrB</i>          | LSL_0005 | COG0187L | DNA gyrase subunit B                       | 4451..6409       | 1959    |
| <i>ileS</i>          | LSL_1042 | COG0060J | Isoleucyl-tRNA synthetase                  | 1065203..1067998 | 2796    |
| <i>lepA</i>          | LSL_0580 | COG0481M | GTP-binding translation elongation factor  | 622843..624672   | 1830    |
| <i>pheS</i>          | LSL_0813 | COG0016J | Phenylalanyl-tRNA synthetase subunit alpha | 829184..830230   | 1047    |
| <i>recA</i>          | LSL_1130 | COG0468L | Recombinase A                              | 1161704..1162849 | 1146    |
| <i>rpoA</i>          | LSL_1409 | COG0202K | DNA-directed RNA polymerase subunit alpha  | 1482888..1483832 | 945     |
| <i>rpoB</i>          | LSL_0197 | COG0085K | DNA-directed RNA polymerase beta chain     | 235025..238624   | 3600    |
| <i>rpoC</i>          | LSL_0198 | COG0086K | DNA-directed RNA polymerase subunit beta   | 238653..242318   | 3666    |

**Genes rMLST**

| <i>L. salivarius</i> |          |          |                            |                  |         |
|----------------------|----------|----------|----------------------------|------------------|---------|
| UCC118 locus         |          |          |                            |                  |         |
| Gene                 | tag*     | COG      | Annotation                 | Co-ordinates*    | Length* |
| <i>rpsA</i>          | LSL_0887 | COG0539J | SSU ribosomal protein S1P  | 910977..912024   | 1048    |
| <i>rpsB</i>          | LSL_0511 | COG0052J | SSU ribosomal protein S2P  | 557234..558031   | 798     |
| <i>rpsC</i>          | LSL_1429 | COG0092J | SSU ribosomal protein S3P  | 1492402..1493058 | 657     |
| <i>rpsD</i>          | LSL_1077 | COG0522J | SSU ribosomal protein S4P  | 1101963..1102562 | 600     |
| <i>rpsE</i>          | LSL_1418 | COG0098J | SSU ribosomal protein S5P  | 1488030..1488530 | 501     |
| <i>rpsF</i>          | LSL_0007 | COG0360J | SSU ribosomal protein S6P  | 9217..9507       | 291     |
| <i>rpsG</i>          | LSL_0201 | COG0049J | SSU ribosomal protein S7P  | 243812..244282   | 471     |
| <i>rpsH</i>          | LSL_1421 | COG0096J | SSU ribosomal protein S8P  | 1489522..1489920 | 399     |
| <i>rpsI</i>          | LSL_1402 | COG0103J | SSU ribosomal protein S9P  | 1477906..1478297 | 392     |
| <i>rpsL</i>          | LSL_0200 | COG0048J | SSU ribosomal protein S12P | 243364..243777   | 414     |
| <i>rpsM</i>          | LSL_1411 | COG0099J | SSU ribosomal protein S13P | 1484365..1484696 | 332     |
| <i>rpsO</i>          | LSL_0638 | COG0184J | SSU ribosomal protein S15P | 681490..681759   | 269     |
| <i>rplA</i>          | LSL_1239 | COG0081J | LSU ribosomal protein L1P  | 1272210..1272751 | 542     |
| <i>rplB</i>          | LSL_1432 | COG0090J | LSU ribosomal protein L2P  | 1493784..1494599 | 816     |
| <i>rplC</i>          | LSL_1435 | COG0087J | LSU ribosomal protein L3P  | 1495557..1496180 | 624     |
| <i>rplD</i>          | LSL_1434 | COG0088J | LSU ribosomal protein L4P  | 1494909..1495532 | 624     |
| <i>rplE</i>          | LSL_1423 | COG0094J | LSU ribosomal protein L5P  | 1490153..1490695 | 543     |
| <i>rplF</i>          | LSL_1420 | COG0097J | LSU ribosomal protein L6P  | 1488953..1489489 | 537     |
| <i>rplL</i>          | LSL_1237 | COG0222J | LSU ribosomal protein L12P | 1270893..1271206 | 314     |
| <i>rplI</i>          | LSL_1727 | COG0359J | LSU ribosomal protein L9P  | 1809124..1809573 | 450     |
| <i>rplJ</i>          | LSL_1238 | COG0244J | LSU ribosomal protein L10P | 1271311..1271814 | 504     |
| <i>rplK</i>          | LSL_1240 | COG0080J | LSU ribosomal protein L11P | 1272873..1273279 | 407     |
| <i>rplM</i>          | LSL_1403 | COG0102J | LSU ribosomal protein L13P | 1478312..1478755 | 444     |
| <i>rplN</i>          | LSL_1425 | COG0093J | LSU ribosomal protein L14P | 1491066..1491428 | 363     |
| <i>rplO</i>          | LSL_1416 | COG0200J | LSU ribosomal protein L15P | 1487364..1487798 | 435     |
| <i>rplQ</i>          | LSL_1408 | COG0203J | LSU ribosomal protein L17P | 1482490..1482849 | 360     |
| <i>rplT</i>          | LSL_0497 | COG0292J | LSU ribosomal protein L20P | 546770..547101   | 332     |
| <i>rplW</i>          | LSL_1433 | COG0089J | LSU ribosomal protein L23P | 1494625..1494909 | 285     |
| <i>rplX</i>          | LSL_1424 | COG0198J | LSU ribosomal protein L24P | 1490781..1491025 | 245     |

\*These columns are provided according to the reference genome *L. salivarius* UCC118



SVNNKDPEEAKQRPHPALTPFIYPNQQLTLATTPDVLSTRLVDFAPIGFGQRLVVAPP  
KAGKTLLKAIANGISKNHPPNAKLIVLLIDERPEEVTDLERSIDGEVVYSTFDQEPNHT  
RVSELVLQRAMRLVEDKQDVVILLDSITRLTRAYNLVTPASGRITLSSGGVDPASFYKPKKF  
FGAARNIEEGGSLTIIGTALVDTGSRMDDVIYEEFKGTGNSLVLSRNLAEERRVFPALDI  
RQSGTRKEELMISRDLVLEQLWNIIRRSRMRGDALEYTEQILQLMKNTKNNDEFIANLKNLNF  
GKKS

>QTS\_2490

LTEDKKNTEETQEKEEFVFMPEANRVEMPATEFKEQPDYKTFANFYISKFDESLEIM  
DVYDGNHDVIEINTYLTNNMAFSRQNLVKHVLNIHANRFLDMLNNIQKQTGVDPQNMKTY  
EDWEKWYTD RRNEIKQTLS

>QTS\_2524

MSHASQDNFLLAKEAKKHNDLPQAKQYLLEALRLGHSDIVCELCEIYLSQEKGDQAYS  
LIKEEPDLFSNQRVYNTYKILAFQHYAIEAAELEHLLQKKLPVKIEPVSQIKQLEIMRN  
FKQLKYIQEKDYLLLYCLSTENFTNLAKSILIDPSPNFALRLSLCEDLIKLGysekvQVY  
ILGELKDFIPKETDLLEKSLIYREVCVSLADYFRQDPSKLPIMIGEMNVCLGMLYPRLND  
YIRDPDQFAHDFRNYLEQKKGGANQKLLNKIYEYLAYEKATNSDF

>QTS\_2525

VKFP IGLRLNAKVNNTKLGIFVTLPHQHHLIFHKDFGDKWESVKKKYSVGD EIRVVVI  
NNHEGKISLSLSQVNNPDLVDPTNEFKDSDFTPLAKLLEKSTDKIANLKNQLNLSDR

>QTS\_3870

MLDSIFSRNTEADKMVVKQQPRYVFGVLNLTADAGYEIHFLNIPDLSAKGVTYAETLYYA  
YRVLSHFLEPFKEDAAQILQYTFRELPIFKKDKNSFLTLITVTHDLDPHKMEMTFLLPQT  
RASELADEADQVGRLLIRFLPNRSTSDQA

>QTS\_4397

MLNFKEKDLRAAVETPQSIGDTRQALTDLYHQRLNYLSGKAQWTTNDQALFELNCSYSRL  
LLDRIWEAYTDNDTIKDSSELLDHTWLQVRGSTSNNVSLDVNYATEDHNTTLFSIQQPLTE  
RAVLAHNLP TLTKKGDEFMLPESDYEPLIQMIKLLYKADYRFTSARETILQPVNNLTFP  
VVFNQPKNFTATEQVGTNVNKLHLDTQIGRYDVRSEFKVDEDEDGNNVTKEGKQPISASGL  
FTWKAENIAPLLDHELTLTVVGVETESLPSLDKLFISAANNSILMKTGDTMSSYRLELPN  
KKT LGVSVDARSESLVLHYPDDETQVYELIKQYPFLGEWLNDV I I K K

>QTS\_4707

MNRHNNNSNKNMTRESFRKRKPFYKRKPFIIISLILIIILIIIGLLIFWKSTSSKDNTHTT  
QPSHKIEKVKPKKETKKKVTKKKHVKKAKKQKADEITAKQQENDNKPKNDQQKKT TNQI  
KNAGTYTDLTYD TDWYTFEISNDVKLVKDSNGDAALLVKYNYTNKTQSNEIPQRVQNTAI  
MLKQDNQQLTATTASGEYSTIVNSSNGLVQPNKSF DGALLVKVKD TDSEVTMYFKNIQT  
NDWLDTTQPLK L K
